1 **Evolutionary transcriptomics reveals longevity mostly driven**  
2 **by polygenic and indirect selection in mammals**

3

4 Weiqiang Liu<sup>1,2#</sup>, Pingfen Zhu<sup>1#</sup>, Meng Li<sup>1</sup>, Zihao Li<sup>1,2</sup>, Yang Yu<sup>3</sup>, Gaoming Liu<sup>1</sup>,  
5 Juan Du<sup>1,2</sup>, Xiao Wang<sup>1</sup>, Jing Yang<sup>1,2</sup>, Ran Tian<sup>4</sup>, Inge Seim<sup>4,5</sup>, Alaattin Kaya<sup>6</sup>,  
6 Mingzhou Li<sup>7</sup>, Ming Li<sup>1</sup>, Vadim N. Gladyshev<sup>8</sup>, Xuming Zhou<sup>1,3\*</sup>

7

8 <sup>1</sup>Key Laboratory of Animal Ecology and Conservation Biology, Institute of  
9 Zoology, Chinese Academy of Sciences, Beijing 100101, China

10 <sup>2</sup>University of Chinese Academy of Sciences, Beijing 100049, China

11 <sup>3</sup>School of Life Sciences, University of Science and Technology of China,  
12 Anhui, 230027, China

13 <sup>4</sup>Integrative Biology Laboratory, College of Life Sciences, Nanjing Normal  
14 University, Nanjing, Jiangsu, 210046, China

15 <sup>5</sup>School of Biology and Environmental Science, Queensland University of  
16 Technology, Brisbane, Queensland, 4000, Australia

17 <sup>6</sup>Department of Biology, Virginia Commonwealth University, Richmond, VA,  
18 23284, USA

19 <sup>7</sup>Institute of Animal Genetics and Breeding, College of Animal Science and  
20 Technology, Sichuan Agricultural University, Chengdu, 611130, China

21 <sup>8</sup>Division of Genetics, Department of Medicine, Brigham and Women's  
22 Hospital, Harvard Medical School, Boston, Massachusetts, 02115 USA

23

24 #Authors contributed equally.

25 \*Correspondence and requests for materials should be addressed to X.Z. (E-  
26 mail: [zhouxuming@ioz.ac.cn](mailto:zhouxuming@ioz.ac.cn)).

27

28 **Abstract**

29 The maximum lifespan varies more than 100-fold in mammals. This  
30 experiment of nature may uncover of the evolutionary forces and molecular  
31 features that define longevity. To understand the relationship between gene  
32 expression variation and maximum lifespan, we carried out a comparative  
33 transcriptomics analysis of liver, kidney, and brain tissues of 106 mammalian  
34 species. We found that expression is largely conserved and very limited  
35 genes exhibit common expression patterns with longevity in all the three  
36 organs analyzed. However, many pathways, e.g., "Insulin signaling pathway",  
37 and "FoxO signaling pathway", show accumulated correlations with maximum  
38 lifespan across mammals. Analyses of selection features further reveal that  
39 methionine restriction related genes whose expressions associated with  
40 longevity, are under strong selection in long-lived mammals, suggesting that a  
41 common approach could be utilized by natural selection and artificial  
42 intervention to control lifespan. These results suggest that natural lifespan  
43 regulation via gene expression is likely to be driven through polygenic model  
44 and indirect selection.

45

46 **Keywords:** Mammals, Longevity, Comparative transcriptomics, Natural  
47 selection

48

## 49 **Introduction**

50 Over ~150 million years of evolution, mammals have diversified dramatically  
51 (over 100-fold) in terms of maximum lifespan (hereafter 'lifespan' and often  
52 used as a proxy for longevity). This experiment of nature has attracted much  
53 interest from biologists (1). The identification of species lifespan-related  
54 genetic variation has been a key approach to resolve this question, with focus  
55 primarily on exceptionally long-lived species. For example, a survey of the  
56 genome of the bowhead whale (the longest-lived mammal known with a  
57 lifespan exceeding 200 years) revealed specific sequence changes in genes  
58 associated with DNA repair, cell cycle, and aging (2, 3). Naked mole rats,  
59 which are the longest-lived rodents (lifespan > 30 years), were reported to  
60 harbor unique variations in genes related to macromolecular degradation,  
61 mitochondrial function, and telomere maintenance, as well as tumor  
62 suppression (4). Similarly, substitutions in genes related to the GH/IGF-1 axis  
63 are found in the Brandt's bat, which is the longest-lived flying mammal known  
64 (5). Recent studies have also shown that elephants could be an attractive  
65 model organism to study aging, as they exhibit a long lifespan (> 50 years), a  
66 low cancer rate, and present an unexpected expansion of potentially  
67 functional TRP53 pseudogenes (6, 7). These studies suggest that there is a  
68 diversity in genetic factors that supports molecular mechanisms of longevity in  
69 mammals.

70 In addition to genetic variation, the lifespan of mammals is also likely to  
71 be modulated by the expression level of genes (8). For example, it was shown  
72 that IGF1R knockout leads to a lifespan increase of 33% and 15.9% in female  
73 and male mice, respectively (9-11). Similarly, mTOR inhibition in mice  
74 increased the median lifespan of female and male mice by ~25% (12-14). In  
75 addition, *SIRT6* overexpression increased the median lifespan of male mice  
76 by 14.5% (15). Comparing gene expression across species is challenging

77 because variables such as developmental stages and environmental factors  
78 can mask or distort genuine expression differences. By assuming that gene  
79 expression is primarily shaped by stable selection, comparative  
80 transcriptomics analyses have been conducted to investigate gene expression  
81 patterns across species from an evolutionary perspective (16-23). For  
82 example, previous studies compared gene expression in the liver, kidney and  
83 brain tissues of 34 mammalian species (16) and cultured fibroblast cells of 16  
84 mammals (13 rodents, two bats, and a shrew), revealing a number of genes  
85 and pathways showing association with maximum longevity (17). These  
86 studies found that the expression of genes related to central energy  
87 metabolism, DNA damage repair, sugar metabolism, and DNA repair was  
88 positively associated with longevity, whereas gene expression associated with  
89 mitochondrial metabolism, transcriptional regulation, calcium-mediated  
90 signaling pathways, protein ubiquitination, and protein localization was  
91 negatively associated (16, 17). At the same time, in the comparison of age-  
92 related transcriptomic changes in *Myotis*, human, mouse and wolf. *Myotis*  
93 exhibits unique molecular mechanisms for lifespan extension in functions  
94 related to DNA repair, autophagy, immunity, and tumor suppression (24).  
95 These studies provide many insights into the relationship between the  
96 variation of gene expression and longevity traits across species. Nevertheless,  
97 the number of species analyzed in previous studies is relatively small and  
98 may not fully represent the diversity of gene expression in mammals.

99 To better characterize the expression profile of protein-coding genes  
100 across the mammalian phylogeny, we generated or obtained transcriptome  
101 data from the brain, kidney and liver tissues of 106 mammals, covering 16  
102 orders and 45 families. First, gene expression in different organs and species-  
103 specific expression patterns were assessed; then genes whose expression  
104 levels was significantly correlated with longevity traits were identified within a

105 phylogenetic framework. Pathways that showed signatures of expression  
106 changes associated with longevity were identified using a modified summary  
107 approach. Finally, an integrated analysis of gene expression and selection  
108 pressure was carried out to measure the intensity of selection of the  
109 associated genes. The data and analyses presented in this study currently  
110 represent the most comprehensive characterization of gene expression in  
111 mammalian organs and contribute to our understanding of how lifespan is  
112 regulated at the level of gene expression.

113

## 114 **Results and Discussion**

### 115 **Data generation and species-specific gene expression**

116 To capture the diversity of gene expression across mammals, RNA-seq data  
117 (~5.2 billion Illumina NovaSeq 6000 reads) were generated from  
118 polyadenylated RNA fraction of liver and kidney tissues of 56 species (**Table**  
119 **S1, Fig. 1A, Fig. S1, and Methods**). Previously published transcriptomes of  
120 liver, kidney and brain of 50 additional species were also used (2, 16, 18, 25-  
121 35) (**Fig. 1A, Fig. S1, Table S1, and Methods**). After filtering and orthologs  
122 calling, a comprehensive expression dataset was obtained for 13,508 protein-  
123 coding genes in three organs of 106 species, which covered the following  
124 orders: Artiodactyla ( $n = 9$ ), Carnivora ( $n = 12$ ), Chiroptera ( $n = 36$ ), Cingulata  
125 ( $n = 1$ ), Eulipotyphla ( $n = 5$ ), Hyracoidea ( $n = 1$ ), Lagomorpha ( $n = 1$ ),  
126 Perissodactyla ( $n = 1$ ), Pilosa ( $n = 1$ ), Primates ( $n = 16$ ), Rodentia ( $n = 18$ ),  
127 and Scandentia ( $n = 1$ ). In addition to 102 placental mammals, our dataset  
128 included the platypus (Monotremata), the Tasmanian devil (Dasyuromorphia),  
129 an opossum (Didelphimorphia), and the sugar glider (Diprotodontia) (**Fig. 1A**  
130 **and Table S2**). Information on adult weight (AW) and longevity-related traits—  
131 including maximum lifespan (ML), female time to maturity (FTM), adult-weight-  
132 adjusted residuals (i.e., MLres and FTMres), and other life-history traits  
133 (habitats, feeding habit, etc.) were also collected and analyzed (see **Methods**,

134 **Fig. 1A** and **Table S2**). Among these traits, ML and FTM reflect changes in  
135 absolute longevity, while the residuals indicate changes in relative longevity  
136 (**Fig. 1A**). Three algorithms (i.e., mice, missForest, and Phylopars) were used  
137 to impute and estimate missing life-history data for the species analyzed (**Figs.**  
138 **1B-C, Fig. S2, Table S2, and Methods**).

139 Principal component analysis of the expression data metrics was  
140 performed to assess the gene expression patterns across species and tissues.  
141 Gene expression was tissue-specific rather than lineage-specific (**Fig. 1D**),  
142 consistent with previous reports (16, 18-20). To characterize genes with  
143 species-specific expression patterns, the specificity index ( $\tau$ ; Tau) for gene  
144 expression was calculated for each tissue (**Methods**). Tau ranges from 0 to 1  
145 and indicates how broadly (0) or specific (1) a gene is expressed (36). None  
146 of the 13,508 genes were broadly expressed across species ( $\tau < 0.2$ ) (**Table**  
147 **S3**), which could be due to the large-scale sampling conducted in this study  
148 (**Fig. 1E**). Compared to the liver and kidney, the brain presented the highest  
149 number of genes showing species-specific expression (6,716, 2,519 and  
150 1,186 genes for the brain, kidney, and liver, respectively) (**Fig. S3**). The gene  
151 with the highest species-specific index in the brain was *GRM1* (glutamate  
152 metabotropic receptor 1). The primary role of this gene is to protect neurons  
153 from apoptosis (37, 38). Studies have shown that motor coordination and  
154 context-specific associative learning is impeded in mice lacking *GRM1* (39). It  
155 is interesting that *GRM1* is also the most highly expressed gene in bats,  
156 because species that specifically express this gene have excellent spatial  
157 memory and the ability to recognize individuals (40). In the kidney, a  
158 detoxification organ, the most highly species-specific genes were *ZNF518A*  
159 (zinc finger protein 518A) and *UBE2N* (ubiquitin-conjugating enzyme E2 N).  
160 These genes regulate the maintenance of cell types (41) and DNA repair (42,  
161 43), respectively, suggesting that they play a role in kidney function. *UBE2N* is

162 also highly expressed among long-lived species—such as vervets, naked  
163 mole-rats, and greater short-nosed fruit bats—which is consistent with  
164 previous reports that DNA repair-related genes are commonly highly  
165 expressed in long-lived species (3, 17, 44). In the liver, the most species-  
166 specific gene was *PTPRG* (protein-tyrosine phosphatase gamma), a marker  
167 of oxidative stress associated with inflammation and aging. It has been  
168 reported that inflammation caused by obesity can promote *PTPRG* expression  
169 in the liver, and an excessive expression of this gene can cause severe liver  
170 and insulin resistance (45).

171 To characterize pathways showing expression specificity across organs  
172 and species, pathway enrichment analysis was performed under a polygenic  
173 model, in which we used the sum of the Tau index of genes in a pathway (46,  
174 47) (**Fig. 1F, Tables S4-5, and Methods**). The brain showed enrichment for  
175 “ABCA transporters in lipid homeostasis” (Score = 10.79,  $P = 2.68 \times 10^{-3}$ ),  
176 “semaphorin interactions” (Score = 43.99,  $P = 2.86 \times 10^{-3}$ ), “PCP/CE pathway”  
177 (Score = 23.69,  $P = 8.67 \times 10^{-3}$ ), and “interaction between L1 and ankyrins”  
178 (Score = 13.26,  $P = 1.64 \times 10^{-3}$ ). Semaphorin interactions and the PCP/CE  
179 pathway regulate synaptic formation and help to determine neuronal polarity  
180 (48-51). They are also important molecular players in the aftermath of nervous  
181 system damage events (52, 53). In the kidney, specifically expressed genes  
182 were enriched in pathways related to detoxification, such as “drug  
183 metabolism-cytochrome P450” (Score = 18.80,  $P = 8.03 \times 10^{-3}$ ),  
184 “*Staphylococcus aureus* infection” (Score = 22.77,  $P = 2.24 \times 10^{-3}$ ), and  
185 “cytokine-cytokine receptor interaction” (Score = 90.39,  $P = 3.92 \times 10^{-3}$ ). This  
186 is consistent with the finding above and represents the organ function. In the  
187 liver, pathways related to oxidative stress, including “nuclear receptors in lipid  
188 metabolism and toxicity” (Score = 18.38,  $P = 1.59 \times 10^{-3}$ ), “synthesis of  
189 glycosylphosphatidylinositol (GPI)” (Score = 8.53,  $P = 3.65 \times 10^{-3}$ ), and

190 “valine, leucine and isoleucine degradation” (Score = 31.07,  $P = 3.63 \times 10^{-3}$ )  
191 were significantly enriched. Interestingly, the “valine, leucine and isoleucine  
192 degradation” pathway is involved in fatty acid metabolism and immune cell  
193 proliferation and is indirectly involved in protein synthesis by affecting the  
194 mTOR signaling pathway (54). Limiting the intake of these amino acids can  
195 extend the lifespan of fruit flies and mice (55, 56). These results indicate that  
196 mammalian expression profiles are related to organ function.

197

### 198 **Genes with expression level associated with maximum lifespan**

199 Phylogenetic generalized least squares (PGLS) regression analysis was  
200 performed to identify genes showing a correlation with longevity between  
201 gene expression and four longevity traits (ML, FTM, MLres, and FTMres) and  
202 AW (adult weight) within the phylogenetic framework. The ordinary least  
203 squares (OLS), Brownian model, and Ornstein-Uhlenbeck model were used  
204 for each gene to determine the best correlation (17, 19, 57). Based on  
205 resampling, the robustness of the correlation was further evaluated through a  
206 two-step verification process (see **Methods** for details), to avoid effects by  
207 outliers ( $P_{robust}$ ) or single species ( $P_{max}$ ) (17, 19, 58). Genes that met both a  
208  $P_{robust} < 0.01$  and  $P_{max} < 0.05$  threshold were considered significant (**Table 1**  
209 **and Table S6**). Based on the obtained results, the total life-history and  
210 longevity variation of mammals explained approximately 3.8–4.4% and 2.7–  
211 3.3% of the total variation in gene expression, respectively. This is likely due  
212 to the higher number (106) of species analyzed here, compared to a previous  
213 report that showed 11%–18% of the inter-species differences explained based  
214 on data from 34 mammal species (16).

215 We further used the sum of regression coefficient of each gene to identify  
216 pathways showing an enrichment with lifespan (46, 47) (**Fig. 2A, Fig. S4,**  
217 **Tables S7, and Table S8**). Significantly enriched pathways related to the



218 immune system and inflammation were detected in the liver. These included  
219 the “inflammatory response pathway” (FTM: Score = 5.54,  $P = 8.00 \times 10^{-3}$ ;  
220 FTMres: Score = 4.36,  $P = 3.02 \times 10^{-2}$ ), “regulation of IFNG signaling” (ML:  
221 Score = 8.62,  $P = 1.90 \times 10^{-3}$ ; MLres: Score = 7.76,  $P = 2.13 \times 10^{-3}$ ; FTMres:  
222 Score = 4.57,  $P = 2.22 \times 10^{-2}$ ), “synthesis of leukotrienes (LT) and eoxins  
223 (EX)” (MLres: Score = 5.93,  $P = 3.07 \times 10^{-2}$ ; FTMres: Score = 5.19,  $P = 1.32$   
224  $\times 10^{-2}$ ), and “prion diseases” (ML: Score = 10.87,  $P = 7.98 \times 10^{-3}$ ; FTM: Score  
225 = 6.59,  $P = 8.92 \times 10^{-3}$ ; FTMres: Score = 3.84,  $P = 4.32 \times 10^{-2}$ ) (**Fig. 2A, Fig.**  
226 **S4 and Fig. S5**). This enrichment is consistent with previous studies reporting  
227 that individuals with longer lifespans show an improved ability to resist  
228 inflammation (59-62). Interestingly, some well-known aging processes were  
229 enriched by genes whose expression showed a significant correlation with  
230 longevity. These included “cellular senescence” (ML: Score = -34.10,  $P =$   
231  $1.52 \times 10^{-3}$ ; FTM: Score = -23.26,  $P = 8.14 \times 10^{-3}$ ; MLres: Score = -42.47,  $P$   
232 =  $2.70 \times 10^{-4}$ ) (**Figs. 2A-B, and Fig. S4**), “direct p53 effectors” (ML: Score =  
233 38.00,  $P = 1.05 \times 10^{-2}$ ; FTM: Score = 24.03,  $P = 1.94 \times 10^{-2}$ ) (**Figs. 2A-C,**  
234 **and Fig. S4**), which also found the same trend in two other tissues. And  
235 “Regulation of CDC42 activity” (ML: Score = -11.24,  $P = 3.17 \times 10^{-3}$ ; FTM:  
236 Score = -4.51,  $P = 3.25 \times 10^{-4}$ ) has the opposite trend in liver and brain (**Fig.**  
237 **2A, Fig. S4, and Fig. S5**). In parallel, pathways related to mitochondrial  
238 function were also detected, such as “alpha-linolenic ( $\Omega 3$ ) and linoleic ( $\Omega 6$ )  
239 acid metabolism” (ML: Score = -6.27,  $P = 6.80 \times 10^{-3}$ ; FTM: Score = -4.00,  $P$   
240 =  $2.59 \times 10^{-2}$ ), and “mitochondrial protein import” (ML: Score = -15.53,  $P =$   
241  $2.95 \times 10^{-3}$ ; FTM: Score = -10.51,  $P = 1.13 \times 10^{-2}$ ), which were enriched by  
242 genes that showed a significant negative correlation with longevity (**Fig. 2A,**  
243 **Fig. S4, and Fig. S5**). In line with this observation, the expression of genes  
244 related to central energy metabolism was reported to be downregulated in  
245 long-lived animals in a previous study of 34 mammals (16). The top genes

246 positively associated with longevity in the liver were *CEP152* (MLres:  $P_{robust} =$   
247  $1.84 \times 10^{-3}$ ; FTMres:  $P_{robust} = 1.91 \times 10^{-4}$ ), *CACYBP* (ML:  $P_{robust} = 3.52 \times 10^{-4}$ ),  
248 *LRP8* (FTM:  $P_{robust} = 4.27 \times 10^{-4}$ ), *RASL12* (FTMres:  $P_{robust} = 5.53 \times 10^{-4}$ ) and  
249 *SLC25A12* (ML:  $P_{robust} = 2.56 \times 10^{-4}$ ; FTM:  $P_{robust} = 7.21 \times 10^{-4}$ ) (**Table S6**).  
250 Some of them are of interest in relation to aging. For example, the loss of  
251 *CEP152* function results in increased DNA damage and delayed entry of the  
252 S phase (63). *CACYBP* promotes autophagy under starvation conditions (64),  
253 and counteracts oxidative stress, and maintain nucleolus stability (65).  
254 *SLC25A12* (encodes aspartate-glutamate carrier isoform 1; AGC1) is highly  
255 expressed in liver cancer cells, where it promotes cell division (66). Among  
256 the top genes negatively associated with longevity in the liver (namely,  
257 *NRROS*, *SCAMP4*, *RBBP7*, *MRPL2*, and *F2R*) (**Fig. S8A**), *NRROS* (FTM:  
258  $P_{robust} = 1.35 \times 10^{-4}$ ) is acetylated after *SIRT6* expression is depleted, and the  
259 activity of this gene was found to be correlated with lifespan across mammals  
260 (67). High expression of *SCAMP4* (FTM:  $P_{robust} = 4.52 \times 10^{-4}$ ) can support  
261 senescence-associated secretory phenotype and accelerate aging (68).  
262 *RBBP7* (ML:  $P_{robust} = 1.05 \times 10^{-3}$ ) was found to be downregulated in  
263 senescent cells and is one of the causes of increased DNA damage (69).  
264 *MRPL2* (ML:  $P_{robust} = 1.31 \times 10^{-3}$ ) activates the mitochondrial unfolded protein  
265 response and extends lifespan in worms (70). Inhibition of *F2R* (ML:  $P_{robust} =$   
266  $2.14 \times 10^{-3}$ ) can also delay aging in worms (71).

267 In the kidney, pathways involved in transcription and translation regulation,  
268 including “eukaryotic translation elongation” (FTM: Score = 8.26,  $P = 1.67 \times$   
269  $10^{-2}$ ; FTMres: Score = 11.09,  $P = 1.44 \times 10^{-3}$ ), and “deadenylation of mRNA”  
270 (ML: Score = 8.58,  $P = 9.26 \times 10^{-3}$ ; FTM: Score = 6.36,  $P = 5.55 \times 10^{-3}$ ;  
271 MLres: Score = 8.95,  $P = 1.70 \times 10^{-2}$ ; FTMres: Score = 6.19,  $P = 2.46 \times 10^{-2}$ ),  
272 were enriched by genes that were positively correlated with longevity-related  
273 traits (**Fig. 2A**, **Fig S4**, and **Fig. S6**). Interestingly, the “mRNA surveillance

274 pathway” (MLres: Score =  $-27.32$ ,  $P = 1.60 \times 10^{-3}$ ) and “tRNA aminoacylation”  
275 (FTM: Score =  $-11.18$ ,  $P = 4.89 \times 10^{-3}$ ), were enriched by genes negatively  
276 correlated with longevity (**Fig. 2A, Fig. S4, and Fig. S6**). It has been reported  
277 that the regulation of translation fidelity is one of the factors controlling  
278 lifespan in a large range of organisms (72, 73). For example, naked mole-rat  
279 has higher translational fidelity than mouse (74). Transfer RNA  
280 aminoacylation is inhibited in senescent cells to limit protein synthesis errors  
281 (75). In addition, seryl-tRNA can directly bind to telomere repeat sequences,  
282 leading to telomere shortening and cell senescence (76). However, it is  
283 unclear why those genes are highly expressed in short-lived species. The  
284 “heme biosynthesis” pathway (ML: Score =  $-4.41$ ,  $P = 3.96 \times 10^{-2}$ ) was  
285 negatively correlated with longevity in the kidney (**Fig. 2A, Fig. S4, and Fig.**  
286 **S6**). In contrast, the “porphyrin and chlorophyll metabolism” pathway (MLres:  
287 Score =  $14.34$ ,  $P = 1.05 \times 10^{-3}$ ; FTMres: Score =  $8.94$ ,  $P = 8.93 \times 10^{-3}$ ) was  
288 positively correlated with longevity in this organ (**Fig. 2A, Fig. S4, and Fig.**  
289 **S6**). Heme is an iron porphyrin compound that acts as a precursor for  
290 hemoglobin, cytochrome and catalase (77). The accumulation of cytochrome  
291 promotes cell senescence (78), and timely metabolized heme can maintain  
292 iron homeostasis and reduce ferroptosis stress in the kidney (79). The top  
293 genes positively associated with longevity in the kidney included *RHOT2* (ML:  
294  $P_{robust} = 3.49 \times 10^{-4}$ ; FTM:  $P_{robust} = 1.72 \times 10^{-4}$ ), *PARN* (ML:  $P_{robust} = 4.00 \times$   
295  $10^{-4}$ ), and *DACH1* (MLres:  $P_{robust} = 4.25 \times 10^{-4}$ ); while the negatively  
296 associated genes included *BHLHE40* (FTM:  $P_{robust} = 1.11 \times 10^{-4}$ ), *DLAT*  
297 (FTMres:  $P_{robust} = 4.22 \times 10^{-4}$ ), and *DIXDC1* (MLres:  $P_{robust} = 7.11 \times 10^{-4}$ ) (**Fig.**  
298 **S8B**). *RHOT2* belongs to the Rho family of GTP enzymes, which are involved  
299 in mitochondrial transport and autophagy (80), and this gene was positively  
300 correlated with longevity in a previous cross-species study (17). *DACH1* is  
301 involved in suppressing tumor metastasis (81), and mutations of this gene

302 were identified in a survey of centenarians (82). Among the genes negatively  
303 associated with longevity, the overexpression of *BHLHE40* was shown to  
304 induce cell senescence, while its knockdown reduced p53-mediated  
305 senescence caused by DNA damage (83, 84). In addition, *BHLHE40* can  
306 inhibit fat synthesis mediated by HIF1 $\alpha$  under hypoxic conditions (85). *DLAT*  
307 can be hydrolyzed by SIRT4, thereby reducing pyruvate dehydrogenase  
308 activity and delaying aging (86, 87). A study conducted to identify biomarkers  
309 of aging, based on RNA-seq and microarray data derived from rats, mice, and  
310 humans, showed that the *DLAT* was downregulated during the aging process  
311 (88).

312 In the brain, the pathways “metabolism of porphyrins” (MLres: Score =  
313 8.96,  $P = 1.52 \times 10^{-3}$ ; FTMres: Score = 4.33,  $P = 3.86 \times 10^{-2}$ ),  
314 “glycosaminoglycan biosynthesis–keratan sulfate” (MLres: Score = 7.57,  $P =$   
315  $2.02 \times 10^{-3}$ ), “voltage-gated potassium channels” (FTM: Score = 7.34,  $P =$   
316  $4.01 \times 10^{-2}$ ; FTMres: Score = 7.33,  $P = 1.31 \times 10^{-2}$ ), and “syndecan-4  
317 mediated signaling events” (FTM: Score = 5.53,  $P = 1.05 \times 10^{-2}$ ; MLres:  
318 Score = 6.50,  $P = 4.86 \times 10^{-2}$ ; FTMres: Score = 5.71,  $P = 4.11 \times 10^{-3}$ ) were  
319 enriched by genes whose expression positively correlated with longevity traits  
320 (**Fig. 2A, Fig. S4, and Fig. S7**). Both “metabolism of porphyrins” and  
321 “glycosaminoglycan biosynthesis – keratan sulfate,” are associated with  
322 clearance of damage in the central nervous system (89, 90). Genes in the  
323 “voltage-gated potassium channels” pathway have been suggested as  
324 potential markers of longevity (91), and a deficiency of this pathway results in  
325 circadian rhythm disruptions (92), shortened lifespan (93) and, possibly,  
326 obesity (93, 94). Among the pathways that were negatively correlated with  
327 longevity traits (**Fig. 2A, Fig. S4, and Fig. S7**), downregulation of the  $\alpha$ 2,6-  
328 linked sialic acid—which functions within the “sialic acid metabolism” pathway  
329 (ML: Score =  $-8.98$ ,  $P = 3.08 \times 10^{-2}$ ; MLres: Score =  $-13.19$ ,  $P = 4.82 \times 10^{-2}$ )

330 has been shown to improve cognitive function in mice (95), whereas the  
331 knockdown of genes in the “PLK1 signaling events” pathway (ML: Score =  
332  $-15.78$ ,  $P = 9.78 \times 10^{-3}$ ) induce autophagy, contributing to clearing proteins  
333 associated with Alzheimer’s and Parkinson’s diseases (96). Among the genes  
334 positively related to longevity in the brain, many respond to oxidative stress,  
335 including *AMBRA1* (FTMres:  $P_{robust} = 4.77 \times 10^{-4}$ ), *ATG2A* (ML:  $P_{robust} = 3.86$   
336  $\times 10^{-3}$ ; FTM:  $P_{robust} = 4.72 \times 10^{-4}$ ), and *MCAT* (MLres:  $P_{robust} = 9.89 \times 10^{-4}$ )  
337 (**Fig. S8C**). Both *AMBRA1* and *ATG2A* regulate autophagy and nervous  
338 system development (97). In addition, *ATG2A* overexpression prolongs the  
339 average lifespan in *Drosophila* (98). *MCAT* is able to scavenge reactive  
340 oxygen species, and its overexpression is neuroprotective (99), and reduces  
341 age-related oxidative stress in mitochondria (100).

342

### 343 **Comparison of longevity-related genes among tissues and gene sets**

344 Unexpectedly, only *SRSF4* (serine/arginine-rich splicing actor 4) showed  
345 strong correlation with longevity in all three examined tissues (Liver: ML- $P_{robust}$   
346  $= 4.00 \times 10^{-4}$ , FTM- $P_{robust} = 1.80 \times 10^{-3}$ ; Kidney: ML- $P_{robust} = 7.20 \times 10^{-2}$ , FTM-  
347  $P_{robust} = 2.50 \times 10^{-3}$ ; Brain: ML- $P_{robust} = 5.80 \times 10^{-3}$ , FTM- $P_{robust} = 4.90 \times 10^{-3}$ )  
348 (**Figs. 2D-G**). This gene is an essential components of spliceosomes, and  
349 thus functions in alternative splicing (101), and is downregulated during  
350 cellular senescence (102). Abnormal *SRSF4* function is associated with heart  
351 disease and reproductive defects (103, 104). Expression changes of splicing  
352 factors with age have been described in human and other animal models  
353 (105). Hence, the strong correlation between longevity and *SRSF4* expression  
354 across species indicating that stable alternative splicing could be a ‘long-lived’  
355 feature and that expression level of this gene may be a marker of lifespan.  
356 Nevertheless, it is worth noting that the expression of *SRSF4* positively  
357 correlated with longevity in the liver and brain, but negatively correlated with

358 longevity in the kidney, suggesting that this gene serves different roles in  
359 lifespan control across tissues. It has also been reported that *SRSF4* is  
360 negatively regulated by male sex hormones in mice Sertoli cells (106) and the  
361 kidney is one of the main target organs of these hormones. However, whether  
362 the expression pattern of *SRSF4* across tissue is regulated by male hormones,  
363 remains unknown to date. Genes (n = 974) with known effects on longevity of  
364 model organisms were also examined, revealing that only a few (n = 76, such  
365 as *AAK1*, *KL*, *NFKB1*, *STRN*, and *TERT* etc.) showed significant correlation  
366 with longevity across phylogeny (1) (**Fig. 2D**). This suggests that most of  
367 these genes do not serve as a basis for the evolution of longevity across  
368 species, although they have been shown to directly contribute to lifespan  
369 control in one or more model species.

370 Nevertheless, several pathways showed correlation with longevity traits in  
371 three tissues. The positively related pathways include "Insulin signaling  
372 pathway" (**Fig. 2H**), "FoxO signaling pathway" (**Fig. 2I**), "Galactose  
373 metabolism", and "FAS (CD95) signaling pathway". And the negatively related  
374 pathways include "Negative regulation of FGFR signaling pathway",  
375 "Aminoacyl-tRNA biosynthesis", "Cytosolic tRNA aminoacylation", "tRNA  
376 Aminoacylation", and "Sema3A PAK-dependent axonal rejection".  
377 Interestingly, "Insulin signaling pathway" (Liver-MLres: Score = 34.45,  $P =$   
378  $3.46 \times 10^{-2}$ ; Liver-FTMres: Score = 26.58,  $P = 4.23 \times 10^{-2}$ ; Kidney-FTM:  
379 Score = 23.40,  $P = 3.86 \times 10^{-2}$ ; Brain-FTM: Score = 27.23,  $P = 4.79 \times 10^{-2}$ )  
380 was positively correlated with lifespan in all three tissues. We also performed  
381 PGLS analyses with longevity traits within Primates, Chiroptera, and Rodentia  
382 (**Tables S9-S11**). The "Insulin signaling pathway" was positively correlated  
383 with longevity in the kidneys of primates (Kidney-ML: Score = 142.62,  $P =$   
384  $8.03 \times 10^{-3}$ ; Kidney-FTM: Score = 105.60,  $P = 1.86 \times 10^{-2}$ ; Kidney-FTMres:  
385 Score = 255.45,  $P = 2.76 \times 10^{-3}$ ), the livers of bats (Liver-ML: Score = 142.62,

386  $P = 1.38 \times 10^{-3}$ ; Liver-MLres: Score = 153.41,  $P = 2.58 \times 10^{-4}$ ), and the brains  
387 of rodents (Brain-FTM: Score = 69.21,  $P = 3.86 \times 10^{-2}$ ; Brain-FTMres: Score  
388 = 75.28,  $P = 1.74 \times 10^{-2}$ ), but negatively correlated in the kidneys of bats  
389 (Kidney-ML: Score = -277.67,  $P = 1.16 \times 10^{-2}$ ; Kidney-MLres: Score = -160.28,  
390  $P = 4.99 \times 10^{-3}$ ). Though it is reported that inhibiting insulin signaling at the  
391 individual level can prolong lifespan (9-11), we found that the expression of  
392 insulin signaling pathway was higher in animals with longer lifespan,  
393 suggesting maintaining of this pathway is critical for regulating aging process.  
394 Pathways, such as “Transport of glucose and other sugars, bile salts and  
395 organic acids, metal ions and amine compounds” (Liver-MLres: Score = -  
396 29.60,  $P = 1.23 \times 10^{-2}$ , Liver-FTMres: Score = -28.74,  $P = 4.00 \times 10^{-4}$ ;  
397 Kidney-FTMres: Score = 21.43,  $P = 1.48 \times 10^{-2}$ ; Brain-MLres: Score = 23.32,  
398  $P = 3.26 \times 10^{-2}$ ; Brain-FTMres: Score = 17.72,  $P = 3.65 \times 10^{-2}$ ) and  
399 “Hemostasis” (Liver-MLres: Score = -107.57,  $P = 4.05 \times 10^{-2}$ ; Kidney-FTM:  
400 Score = 75.38,  $P = 2.30 \times 10^{-2}$ ; Brain-FTM: Score = 90.11,  $P = 2.03 \times 10^{-2}$ )  
401 positively correlated with longevity traits in the kidney and brain, but shown  
402 negative correlation in the liver. “G alpha (s) signalling events” (Liver-ML:  
403 Score = -21.35,  $P = 1.42 \times 10^{-2}$ , Kidney-ML: Score = 21.42,  $P = 3.05 \times 10^{-2}$ ;  
404 Kidney-FTM: Score = 15.37,  $P = 3.70 \times 10^{-2}$ ; Brain-FTM: Score = 13.43,  $P =$   
405  $1.74 \times 10^{-2}$ ; Brain-FTMres: Score = 21.70,  $P = 6.40 \times 10^{-3}$ ). This is interesting  
406 as neither of them showing consistent direction of correlation with longevity  
407 traits in three organs. The possible explanation could be the role of pathway in  
408 organ aging are different or even opposite. For example, calorie restriction in  
409 the kidneys reduces damage from oxidative stress by reducing the activity of  
410 certain heme proteins (e.g., Myeloperoxidase, MPO) through anti-  
411 inflammatory effects (107). However, caloric restriction activates FOXO1 in  
412 the liver, which further disrupts mitochondrial function and lipid metabolism via  
413 heme (108).

414 To understand the variation of longevity-related genes derived from  
415 different genomic sources, we next considered longevity-related genes within  
416 metrics that assess the degree of mutation tolerance (essential vs. non-  
417 essential genes, and disease-harboring vs. non-disease genes”) and reflect  
418 fitness (haplo-sufficient vs. haplo-insufficient genes, and new vs. old genes)  
419 (see **Methods** for details). The results (**Table S12**) showed that the direction  
420 of the coefficients of absolute (ML and FTM) and relative (MLres and FTMres)  
421 longevity-related genes was inconsistent in each gene metric, indicating that  
422 most correlations were confounded by body weight. For example, among the  
423 mutation tolerance metrics, it was observed that essential genes showed a  
424 positive correlation in gene expression with the gradient of ML compared to  
425 non-essential genes (average coefficients for the essential/non-essential  
426 group: liver, 1.25/0.68; kidney, 0.36/0.17; brain, 0.92/0.31) (**Fig. 3**). However,  
427 most essential genes whose expression significantly correlated with MLres  
428 showed the opposite trend to those that correlated with ML (average  
429 coefficients for essential/non-essential group: liver, -0.31/0.02; kidney,  
430 -0.43/0.27; brain, -0.60/-0.91) (**Fig. 3**). The coefficients of young genes and  
431 disease-harboring genes had a similar pattern compared to their counterparts.  
432 In particular, the coefficient direction of the haplo-sufficient gene in the kidney  
433 was always opposite to the other two organs. This observation suggests that  
434 more attention should be paid to the selection of organs in aging experiments.  
435 The results also showed a considerable variation in the coefficient of haplo-  
436 sufficient genes among tissues (**Fig. 3**), which indicates that these genes play  
437 diverse roles in lifespan across organs.

438

### 439 **Relationship between selection pressure and gene expression**

440 To uncover the relationship between the intensity of selection and gene  
441 expression, we used RELAX in Hyphy (109) to assess if selection pressure



442 relaxed by inferring with the parameter ( $k$ ) (**Table S13**). The relaxation  
443 parameter  $k$  was estimated for each gene with long-lived mammals set as the  
444 foreground branch ( $\omega_{\text{background branch}}^k = \omega_{\text{foreground branch}}$ ). A  $k > 1$  indicates that a  
445 gene in the foreground branch is under intensified selection, while  $k < 1$   
446 indicates relaxed selection. The genes whose expression was correlated with  
447 longevity were divided into four categories (**Fig. 4A**): positively correlated  
448 genes under intensified selection (IU), positively correlated genes under  
449 relaxed selection (RU), negatively correlated genes under intensified selection  
450 (ID), and negatively correlated genes under relaxed selection (RD). The  
451 results showed that approximately 62% of total genes are under intensified  
452 selection in long-lived mammals (defined as having an ML > 30 yrs.) (**Figs.**  
453 **4B-C** and **Table S14**). This is interesting, as a previous study reported that  
454 genes tend to be under relaxed selection in shorter-lived killifish (110). We  
455 also tested what type of selection was present at different maximum-lifespan  
456 intervals (ML < 12; 12 ≤ ML ≤ 26; 26 < ML; 50 < ML), and the results  
457 consistently showed that species with longer lifespans tend to have a greater  
458 number of genes under intensive selection (**Fig. S9** and **Tables S15-17**). We  
459 then found that the pattern of selection intensity related to the direction of  
460 longevity-associated genes is different across organs ( **Figs. 4D-I** and **Fig.**  
461 **S10**). Particularly, in the kidney, a similar proportion of both positively and  
462 negatively associated genes was under intensified selection. However, a  
463 comparatively higher proportion of positively associated genes—rather than  
464 negatively associated genes—was found to be under intensified selection in  
465 the liver, while a higher proportion of negatively associated genes was under  
466 intensified selection in the brain. It was also observed that several longevity-  
467 related genes are under strong intensification of selection in long-lived  
468 mammals (**Fig. 4** and **Fig. S10**). For example, among the genes in the IU  
469 category, *ICMT* is upregulated in *Drosophila* with extended lifespan (111), and

470 *KCNC4*, which mediates the voltage-dependent potassium ion permeability of  
471 excitable membranes, is a marker of longevity (91, 93). Within the ID category,  
472 the downregulation of *CCND2* promotes cell cycle arrest and apoptosis and  
473 leads to cell senescence (112-114), while *ZNRF2* is one of the top genes  
474 negatively correlated with longevity in the liver tissue and is involved in the  
475 mTOR signaling pathway (115). In addition, we observed that the longevity  
476 correlated genes are characterized by either intensified or relaxed positive  
477 selection. In parallel, the strength of purifying selection of those genes has  
478 been less changed (**Table S14**).

479 Pathway enrichment analysis of longevity correlated genes was performed  
480 using the relaxation parameter ( $k$ ) as a statistic to further characterize the  
481 cumulative effect of relaxed and intensified selection in long-lived mammals  
482 (**Fig. S11** and **Table S18-19**). Pathways related to methionine metabolism  
483 were detected, such as the “methionine salvage pathway” (Score = 8.41,  $P =$   
484  $7.27 \times 10^{-4}$ ) and “glycerolipid metabolism” (Score = 21.31,  $P = 2.82 \times 10^{-3}$ ),  
485 which are enriched by genes under intensified selection. Methionine is one of  
486 the essential amino acids, and similarly to calorie restriction, methionine  
487 restriction has been reported to extend lifespan (116-118), reverse  
488 inflammation, and reduce DNA damage (118, 119). Interestingly, our analysis  
489 revealed that several pathways associated with acceleration of the aging  
490 process are under relaxed selection in long-lived mammals. These pathways  
491 included “CD28 dependent PI3K/Akt signaling” (Score = -8.31,  $P = 8.69 \times 10^{-3}$ ),  
492 “WNT ligand biogenesis and trafficking” (Score = -10.42,  $P = 9.69 \times 10^{-3}$ ), and  
493 the “VEGF signaling pathway” (Score = -7.24,  $P = 4.43 \times 10^{-2}$ ). Inhibition of  
494 these pathways has been shown to extend lifespan (120-123).

495

496

497

## 498 **Conclusions**

499 In this study, a comparative transcriptomics analysis of 106 species  
500 representative of diverse families was performed to describe gene expression  
501 diversity in mammals. It was found that gene expression was conserved, with  
502 the strongest specificity in the brain, compared to the liver and kidney, and  
503 that the expression of species-specific genes may reflect adaptive traits (e.g.,  
504 bats' requirement for long-term memory). In our study, the effect of adult  
505 weight on the robustness of longevity-related genes is very limited, and the  
506 intersection of longevity-related genes and adult weight-related genes is very  
507 small (**Fig. S12A**), which is consistent with previous study (16, 17). In addition  
508 to very few known aging-related genes (e.g., *TP53*, *LRP8*, *RBBP7*, and  
509 *SCAMP4*) that showed correlation with longevity, many new genes whose  
510 expression levels significantly correlated with longevity across mammalian  
511 phylogeny were identified (e.g., *SRSF4* in all tissues, *SLC26A6*, *ELFN1* and  
512 *NEURL1* in the liver, *SCARA3* in the kidney, and *STX5* in the brain) (**Figs.**  
513 **2D-G** and **Figs. S12B-G**). Enrichment of many well-known aging-related  
514 pathways were also observed. These included "Insulin signaling pathway",  
515 "FoxO signaling pathway", "inflammatory response pathway," "cellular  
516 senescence," and "p53 signaling pathway". Importantly, our study also  
517 detected other pathways—such as "eukaryotic translation extension," "non-  
518 classical Wnt signaling pathway," "mRNA polyadenylate," "mRNA detection  
519 pathway," and "tRNA aminoxylation". This supports reports that a stable  
520 protein synthesis (proteostasis) is important for lifespan control (73, 124). We  
521 found that longer-lived animals always had more genes that under intensified  
522 selection than shorter-lived animals. Although it is generally believed that  
523 there is a certain correlation between selection pressure and gene expression  
524 (110), this was not significantly observed in relation to the gradient of  
525 longevity, suggesting lifespan is not favored directly by natural selection (125).

526 We still found that methionine restriction is under Intensified selection in long-  
527 live mammals. However, given most of our samples are matured males, the  
528 variation of gene expression among different ages and genders have not  
529 been quantified in our study. And, because of the high-quality genome  
530 assembly are not available for many species that analyzed, it is difficult to  
531 disentangle the role of the expression changes of paralogous and multi-copy  
532 genes in longevity evolution. Nevertheless, the data and results presented in  
533 this study would aid future investigations with inclusion of samples at different  
534 ages of both genders. Overall, our study suggests that the evolutionary  
535 correlation between gene expression and longevity is organ-specific and  
536 characterized by polygenic selection. The longevity-associated genes  
537 identified could serve as candidate targets for further exploration of healthy  
538 aging.

539

## 540 **Materials and Methods**

### 541 **Tissue collection**

542 The 331 organ samples analyzed in the present study were newly obtained  
543 from 56 species (**Tables S1** and **S2**). Liver, kidney and brain tissues were  
544 mostly sampled from adult and male individuals, if possible, and were freshly  
545 frozen in liquid N<sub>2</sub> and stored at -80°C. To maximize sample compatibility,  
546 each major part of each organ was dissected and homogenized. To  
547 objectively detect the biological variation of gene expression, three biological  
548 replicates were obtained when possible. All the experimental protocols were  
549 approved by the Animal Care and Use Committee of the Institute of Zoology,  
550 Chinese Academy of Sciences (No. IOZ-IACUC-2021-129).

551

### 552 **Transcriptome library preparation and sequencing**

553 Total RNA was isolated from frozen tissue using TRIzol<sup>®</sup> Reagent (Invitrogen).  
554 To protect RNA as much as possible during homogenization, we first added

555 0.2 mL TRIzol<sup>®</sup> Reagent directly to a tube containing 100 mg of frozen tissue  
556 and homogenized using a motorized homogenizer. After homogenization, we  
557 added another 0.8 mL of TRIzol<sup>®</sup> to the tube. The resulting lysate was phase  
558 separated with 0.2 ml chloroform and total RNA precipitated with 0.5 ml  
559 isopropanol. The RNA was washed twice with 1 ml 75% ethanol and  
560 resuspended in DEPC treated ddH<sub>2</sub>O. The resuspended RNA was assessed  
561 for quality (260/280 nm absorbance ratio) and integrity (formaldehyde agarose  
562 gel electrophoresis). The sequencing libraries were prepared using the  
563 NEBNext Ultra RNA Library Prep Kit for Illumina (NEB, USA), and the  
564 transcriptome libraries were sequenced on an Illumina NovaSeq 6000 system  
565 (Novogene Co. Ltd) with paired-end reads of 150 bp. NGS QC Toolkit v2.3.3  
566 (126) was used to remove reads containing adapters and filter low quality  
567 reads (<Q20).

568

### 569 **Orthologous gene sets**

570 Genome annotations (GTF) for 39 mammals with sequenced genomes were  
571 obtained from Ensembl, release 99. For the minke whale (*Balaenoptera*  
572 *acutorostrata*), Indian muntjac (*Muntiacus muntjac*), great roundleaf bat  
573 (*Hipposideros armiger*), Chinese rufous horseshoe bat (*Rhinolophus sinicus*),  
574 Brandt's bat (*Myotis brandtii*), François's leaf Monkey (*Trachypithecus*  
575 *francoisi*), and white-footed mouse (*Peromyscus leucopus*) we used GTF  
576 annotations and genomes downloaded from NCBI database. For the bowhead  
577 whale (*Balaena mysticetus*) we used genomes downloaded from 'The  
578 Bowhead Whale Genome Resource' (127) (**Table S2**). The GTF of bowhead  
579 whale was generated using augustus v 2.5.5 (128). Draft transcriptome of 59  
580 mammals were *de novo* assembled using trinity v2.11.0 (129). First, the RNA-  
581 seq reads from same species and tissues were assembled together. Because  
582 the Trinity assembler filters low-coverage k-mers, we did not perform quality

583 trim of the reads before assembly. Trinity was run on 150 bp paired-end  
584 sequences with default parameters k-mer size of 25 (fixed), minimum contig  
585 length of 200, maximum paired fragment length of 500, and adjusted butterfly  
586 maximum heap space setting to 30G. To remove redundancy, we then used  
587 cd-hit (130, 131) to process the assembled transcripts from different tissues  
588 of the same species, cluster the sequences with 90% similarity, and leave the  
589 longest transcript in each cluster. We used augustus to perform gene  
590 prediction on the de-redundant transcripts and obtain GTF annotation files.  
591 We used gffread in the cufflink package v2.2.1 (132) to extract the CDS  
592 sequence, filtered out incomplete ORF transcripts and pseudogene transcripts,  
593 and extracted the longest transcript of each gene. Given the genome  
594 assembly for most of species are scarce or not well-annotated, multi-copy  
595 genes and transcripts were not considered in the analyses. To reduce the  
596 effects of paralogs on the ortholog identification, we constructed the human  
597 reference sequence using BLAST v2.9.0+ (133) to remove highly repetitive  
598 and highly similar genes, with e-value  $< 10^{-6}$  and Identity  $> 90\%$  as the filtering  
599 threshold. In the end, 18,553 unique protein coding genes were obtained as  
600 reference sequences. For other mammals, the longest transcript of each gene  
601 was extracted and reciprocal BLAST was performed with the protein  
602 sequences from human. The filtering threshold was  $10^{-6}$  for e-value and 30%  
603 for identity. Two genes that were best aligned with each other were defined as  
604 orthologous genes. When a gene exists in fewer species, it indicates that the  
605 gene is not highly conserved and cannot be representative of mammals.  
606 However, as the number of species increases, the number of orthologous  
607 genes that coexist in all species decreases (only 989 genes are present in all  
608 species). To balance the number of species and genes, we filtered out genes  
609 that exist in less than 70 species. The final dataset of orthologous gene  
610 accounted for 13,916 individual groups of sequences. In downstream

611 analysis, each gene is analyzed individually, and only the species in which the  
612 gene is present were considered.

613

#### 614 **RNA-seq reads mapping and normalization**

615 Because the complete genome and the *de novo* genome are quite different  
616 when compared, we used the CDS sequence of orthologous genes as the  
617 reference genome, and generate annotation files in GTF format for RNA-seq  
618 data mapping. STAR v2.7.1a (134) was used to construct an index. Because  
619 of the specificity of the orthologous genomes, the parameters '--  
620 genomeSAindexNbases' and '--genomeChrBinNbits' were calculated from the  
621 sequence size of the homologous gene set and the read length of different  
622 samples. And we used the default parameters to align the RNA-seq data with  
623 the orthologous genomes. We used featureCounts v2.0.0 (135) to count reads,  
624 and eliminate multiple-matched reads (**Table S20**). Generating gene  
625 expression profiles for all species based on pairwise orthologous relationships.  
626 Finally for 18,553 genes, abnormally low-expressed genes that is, genes  
627 whose expression levels were less than 10 in 4 or more samples were filtered  
628 before normalization (2,564 genes were removed). And, abnormally high  
629 expression genes, that is, genes whose total expression of all samples  
630 accounted for 5% of the expression of the entire data set was also removed (1  
631 gene). The function `comBat_seq` in the R package `sva` (136) was applied to  
632 read counts to remove the batch effect, including the two factors most likely to  
633 affect the data: different sources of data (Bioproject and sequencing batches  
634 of our data) and the deviation caused by the sequencing platform (137). Two  
635 factors were adjusted separately. And the covariates were tissue and species.  
636 Genes with orthologous in more than 70 species were used for downstream  
637 analysis to reduce the false positive rate in the analysis (13,827 genes in  
638 total). We calculated the library size of each sample as a normalization factor.

639 The R software package edgeR (138) was used to normalize the library size  
640 and gene length (based on humans) by  $\log_2(\text{TMM-RPKM} + 1)$ . For paired-end  
641 data, featureCounts counts fragments, so calculating RPKM for paired-end  
642 data is equivalent to FPKM.

643

#### 644 **PCA analysis and species specificity of gene expression.**

645 We calculated the variance of each gene on the normalized expression matrix,  
646 and selected the top 5,000 genes with the largest variance to perform  
647 principal component analysis (PCA) using the R package 'FactoMineR' (139).

648 In order to define gene sets that are widely expressed by species and  
649 species-specifically expressed genes. We calculated the mean value of  
650  $\log_2(\text{RPKM-TMM} + 1)$  in each organ for each species. We calculated the  
651 species-specific expression index Tau,  $\tau = \frac{\sum_{i=0}^N (1-x_i)}{N-1}$ , which is used to quantify  
652 the tissue specificity of gene expression (36). Among them, N is the number  
653 of species,  $x_i$  is the expression level of the i-th species. Tau > 0.8 is defined  
654 as a species-specific gene.

655

#### 656 **Life-history data collection and imputation.**

657 To accurately estimate the species for which life history data were missing in  
658 this study. We collected data on highly correlated life-history traits (AW: adult  
659 weight, ML: maximum lifespan, and FTM: female mature time) for a total of  
660 1,250 species from the online databases AnAge (1), Animal Diversity Web  
661 (<https://animaldiversity.org/>) and PanTHERIA (140), and from the literature.  
662 And the phylogenetic tree was retrieved from TimeTree  
663 (<http://www.timetree.org/>) (141). Three life-history traits from 816 species were  
664 complete and used as a training set and, we employed three imputation  
665 methods to estimate the missing data: (i) Based on the Markov chain Monte  
666 Carlo method, mice introduces the random process into the interpolation



667 process, uses other variables as predictors, and specifies a conditional model  
668 for each variable (142). We used the predictive mean matching (pmm) as the  
669 conditional model in the multiple regression model, or used mean matching  
670 (mean) instead if the first run did not converge. We selected the case where  
671 the predicted regression score was closest to the missing value. (ii)  
672 missForest first uses the mean to interpolate a column of data (143) and then  
673 uses the remaining variables of the data set to fit a random forest model to  
674 estimate missing values by applying trained random forest predictions. This  
675 process was looped for all variables that need to be interpolated, and the  
676 whole process was repeated until the stop criterion was reached. (iii)  
677 Phylopars estimates missing values based on restricted maximum likelihood  
678 (144). This method calculates the covariance matrix based on phylogenetic  
679 and phenotypic components (when multiple trait measures are given). It builds  
680 a multivariate normal model that combines the best phylogenetic and  
681 phenotypic covariance with the tree to calculate the covariance between the  
682 observed and missing values. Therefore, the estimated value was determined  
683 by phylogenetic distance (correlation between species) and ectopic  
684 relationship (correlation between features).

685 The percentages of missing values in the missing set were 6% (ML) and  
686 30% (FTM). We tested three types of missing data: (i) Completely missing at  
687 random (MCAR); (ii) Missing at random based on weight (MAR.AW), and it  
688 was divided into two types of species according to the median weight.  
689 Because low-weight species may have more missing values; (iii) Missing at  
690 random based on the genetic distance between human (MAR.HD), and it was  
691 divided into two types of species according to the half of the farthest genetic  
692 distance. Because species with a greater genetic distance from humans may  
693 receive less attention from scientists, the life-history is also opted to be  
694 missed.

695 We performed chi-square tests on the two types of MARs in the missing  
696 set. In addition, missing values in large-weight species accounted for 17.57%  
697 of the total missing values in maximum lifespan (ML), and 82.43% in small-  
698 weight species. In FTM, the missing values of the large-weight species  
699 accounted for 37.66% of the total missing values, and the small-weight  
700 species 62.34%. We introduced multiple missing value ratios (5%, 10%, 15%,  
701 20%, 25%, 30%, 40% and 50%) to the training set to simulate the distribution  
702 and pattern of missing values. We used the above three methods for 10  
703 interpolations and imputation. In order to account phylogenetic relationships in  
704 the imputation process (Phylopars are only applicable to imputations that  
705 include phylogeny), R package PVR was used (145) to perform principal  
706 coordinate analysis (PCoA) on the genetic distance matrix of 816 species to  
707 obtain phylogenetic feature vectors. The phylogenetic relationship after  
708 dimensionality reduction is used as other predictor variables in the imputation  
709 process. At the same time, we obtained the optimal number for interpolation  
710 by adding phylogenetic vectors in the interpolation process incrementally.  
711 We evaluated the accuracy of the interpolation based on the normalized root

712 mean square error (NMRSE) as 
$$\text{NMRSE} = \frac{\sqrt{\text{mean}((X_{\text{imp}} - X_{\text{true}})^2)}}{\max(Y_{\text{true}}) - \min(Y_{\text{true}})}$$
.

713 And, in order to ensure that the estimated value retains biological  
714 significance. We also calculated the bias of the slope ( $\text{Bias} = |\text{Slope}^{\text{original}} -$   
715  $\text{Slope}^{\text{imputed (or missing)}}|$ ) between adult weight and maximum lifespan in the  
716 data set after interpolation.

717 Finally, we selected the best Phylopars based on the evaluation results  
718 for the imputation of the complete life history data set (**Table 2**). To identify  
719 confounding factors of maximum lifespan, we collected multiple complex  
720 effects such as society, diet, habitat, activity, body mass, basal metabolism  
721 rate, and offspring per year. We have used MCMCglmm to examine the

722 correlation between longevity and other factors. The result showed that body  
723 mass and offspring per year were significantly associated with maximum  
724 lifespan, and a weak association between diet and maximum lifespan (**Table**  
725 **S22**). And we also detected a strong correlation between body mass and  
726 offspring per year. Previous studies also have shown that the longevity (or  
727 female time to maturity) was mainly correlated with body mass (16).  
728 Nevertheless, many species show with small weight and long maximum  
729 lifespan (or female time to maturity). Therefore, we calculated the residuals to  
730 correct the confounding effects caused by weight (i.e., MLres and FTMres).  
731 Both residual equations are obtained based on linear regression model using  
732 the data from the AnAge database (1).

733

#### 734 **Phylogenetic regression analysis.**

735 To identify genes with the expression related to longevity, three evolution  
736 models were tested for gene expression in each tissue (mean value of log<sub>2</sub>-  
737 scaled TMM-RPKM) and each log<sub>2</sub>-scaled longevity-related trait (ML, FTM,  
738 MLres, FTMres), including regression models that do not consider  
739 phylogenetic relationships (OLS), and regression models that consider  
740 phylogenetic relationships (BM and OU). And the optimal model was selected  
741 according to the maximum likelihood methodology. The phylogenetic tree was  
742 retrieved from TimeTree (141). The unit of branches length of the  
743 phylogenetic tree is million years. To avoid randomness, we took a resampling  
744 approach (58) instead of using conventional P-value corrections (e.g., BH) . A  
745 two-step method is used to correct the *P* value (17, 19). In the first step, the  
746 species that has the greatest impact on the slope (i.e., potential outliers) is  
747 removed by the residuals (the largest absolute value of the residual is  
748 removed), and then the regression is performed again. At this time, the *P*  
749 value obtained is defined as *P<sub>robust</sub>* to remove the influence of the outliers on

750 the regression. The second step is to repeat the regression process for the  
751 remaining species and remove one of remaining species each time until all  
752 remaining species are removed once, and take the largest (least significant)  $P$   
753 value in the process as  $P_{max}$  to remove the impact of species on regression.  
754 The cutoff for identifying longevity-related genes was  $P_{max} < 0.05$ ,  $P_{robust} < 0.01$ .

755 To reduce the noise caused by missing data, for each gene, we only  
756 consider the species in which the gene exists, and did not add all species to  
757 the model, that is, set the expression value of a gene that does not exist in a  
758 species to the missing value instead 0.

759

### 760 **Multiple sequence alignment and selection pressure analysis.**

761 For each group of orthologous genes, the Perl script 'translatorX.pl' (146) is  
762 used for multiple sequence processing and comparison. This pipeline selects  
763 the default parameters of the 'MAFFT' (147) to first translate the nucleic acid  
764 sequence into a protein sequence for multiple sequence alignment and then  
765 translate it back into a nucleic acid sequence. We then used 'GBlock' (148,  
766 149) to select the conservative blocks, with the number of conservative sites  
767 in the gene sequence after alignment is at least 75% of the total length of the  
768 gene, and the shortest flanking sequence is greater than 85% of the length of  
769 the gene after the alignment.

770 In order to test whether genes are under relaxed selection, we used the  
771 minimal model of RELAX (109) in 'Hyphy', with long-lived animals (ML > 30  
772 years) were set as foreground branches. Because the number of non-long-  
773 lived mammals (n=82) is far more than that of long-lived mammals (n=24).  
774 We selected 24 representative species with good genome quality from non-  
775 long-lived mammals as background branches to eliminate the noise caused  
776 by the excessive number of background branch species (**Table S21**). This  
777 model uses the likelihood ratio test to compare the two models with the same

778 evolution rate ( $k = 1$ ) and different rates ( $k \neq 1$ ) between the foreground  
779 branch and the background branch. The parameters are set to estimate 3  
780 types of  $\omega$  ( $\omega_1$ : purification selection;  $\omega_2$ : neutral selection;  $\omega_3$ : positive  
781 selection). The relaxation parameter  $k$  is an index of the selection strength  
782 ( $\omega_{\text{background branch}}^k = \omega_{\text{foreground branch}}$ ), with  $k > 1$  indicates that the genes in the  
783 foreground branch are under intensified selection and  $k < 1$  indicates a  
784 relaxed selection. And we also test relaxed selection at different interval (ML  
785  $< 12$ ;  $12 \leq \text{ML} \leq 26$ ;  $26 < \text{ML}$ ;  $50 < \text{ML}$ ) of ML by use 57 mammals which  
786 have real life-history traits data (**Table S15-17**).

787

### 788 **Gene set enrichment analysis**

789 We use 'Polysel' (46, 47) for gene set enrichment analysis which is possible  
790 to detect pathways containing pleiotropic signals. In addition, other variables  
791 (such as gene length, number of species, and genetic distance) can also be  
792 used to adjust statistical variables. For the species-specific expression, we  
793 used the species-specific expression index (Tau) as the gene score  
794 (SUMSTAT) to detect species-specific expression pathways and ubiquitous  
795 expression ( $1 - \text{Tau}$ ) pathways. For gene expression variation, we used the  
796 coefficients in the PGLS regression as SUMSTAT to enrich genes that are  
797 positively related to longevity (SUMSTAT of negatively related genes is set to  
798 0) and negatively related genes (SUMSTAT of positively related genes is set  
799 to 0 and converted to Absolute value) to detect longevity-related pathways  
800 with genetic minor effects. Since gene expression is mostly related to gene  
801 length or species number, we used the function 'RescaleBins' to adjust  
802 SUMSTAT. We used 'ks.test' in R to check whether the gene score  
803 (SUMSTAT) is normally distributed or not. If not, a random data set was  
804 generated to construct an empirical distribution.

805

## 806 **Gene category collection**

807 We collected different types of gene sets from various sources for comparison.

808 The essential genes were constructed based on the probability of intolerance  
809 to loss of function, which is the pLI score (150). The score data comes from  
810 ExAC version 0.3.1 (<https://gnomad.broadinstitute.org/>). Genes with pLI > 0.9  
811 are defined as essential genes. The list of genes associated with human  
812 inherited disease was obtained from the manually curated HGMD (PRO 17.1)  
813 (151). Aging genes were obtained from the GenAge database (1) and  
814 determined based on experimental evidence from humans and model  
815 organisms. They included genes related to the basic human aging process as  
816 well as genes related to lifespan. According to the homology relationship, the  
817 respective gene ID numbers were converted into human gene ID numbers.  
818 The Haploid Insufficiency (HI) score from previous studies (152) was used to  
819 quantify the degree of haploid deficiency in human genes. After sorting in  
820 descending order, we defined genes greater than the first quartile as haplo-  
821 insufficient genes, and genes less than the fourth quartile as haplo-sufficient  
822 genes. Finally, the phylogenetic age of mammalian genes was retrieved from  
823 the GenTree database (<http://gentree.ioz.ac.cn/>) (153). We divided genes into  
824 two groups based on genetic age: (i) those genes that appear after therian,  
825 mammalian, vertebrate, or quadrupedal ancestors (genes are defined as  
826 relatively young) and (ii) those that appear earlier than bone vertebrates  
827 Genes (defined as relatively old genes).

828

## 829 **Data and code availability**

830 Raw RNA-seq data for liver and kidney of this study are available from  
831 Sciencedb with doi number 10.11922/sciencedb.01196. Raw RNA-seq data  
832 for brain are available from Sciencedb with doi number  
833 10.11922/sciencedb.01197. The SRA ids of the data retrieved from NCBI are

834 listed in **Table S1**. The code of this study is available from github  
835 (<https://github.com/liu-wq/expressionML>).

836

### 837 **Acknowledgements**

838 We thank Alice Hughes, Xing Chen and Yanhua Chen for the experience and  
839 technology of sample collection. We thank Pengcheng Wang, Xiaoxiao Zhang,  
840 Zhan Zhang, and Qi Pan for supporting sample collection and preparation.

841 This project was supported by National Natural Science Foundation of China  
842 (82050002) and the Beijing Natural Sciences Foundation (JQ19022). VNG is  
843 supported by grants from the National Institute on Aging.

844

### 845 **Author contributions**

846 X.Z. conceived the study and designed the project. W.L. and P.Z. managed  
847 the project. W.L., P.Z., M.L., Z.L., Y.Y., G.L., X.J. and X.W. collected samples.  
848 W.L., P.Z., M.L., Z.L., Y.Y., J.D. and J.Y. prepared samples and performed  
849 RNA extraction. W.L. performed transcriptome assembly, annotation and  
850 bioinformatics analysis. W.L. and P.Z. performed life-history collection and  
851 imputation. W.L. and P.Z. discussed the data. W.L. wrote the manuscript with  
852 contributions from X.Z., M.L., V.N.G., I.S., L.W. and A.K.. All authors  
853 contributed to data interpretation.

854

### 855 **Competing interests**

856 The authors declare no competing interests.

857

858

859

860

861

862

863

864

865 Reference

866

- 867 1. R. Tacutu, T. Craig, A. Budovsky, D. Wuttke, G. Lehmann, D. Taranukha, J. Costa, V. E. Fraifeld, J.  
868 P. de Magalhaes, Human Ageing Genomic Resources: integrated databases and tools for the  
869 biology and genetics of ageing. *Nucleic Acids Reseach* **41**, D1027-1033 (2013).
- 870 2. I. Seim, S. Ma, X. Zhou, M. V. Gerashchenko, S. G. Lee, R. Suydam, J. C. George, J. W. Bickham,  
871 V. N. Gladyshev, The transcriptome of the bowhead whale *Balaena mysticetus* reveals adaptations  
872 of the longest-lived mammal. *Aging (Albany NY)* **6**, 879-899 (2014).
- 873 3. M. Keane, J. Semeiks, A. E. Webb, Y. I. Li, V. Quesada, T. Craig, L. B. Madsen, S. van Dam, D.  
874 Brawand, P. I. Marques, P. Michalak, L. Kang, J. Bhak, H.-S. Yim, N. V. Grishin, N. H. Nielsen, M.  
875 P. Heide-Jørgensen, E. M. Oziolor, C. W. Matson, G. M. Church, G. W. Stuart, J. C. Patton, J. C.  
876 George, R. Suydam, K. Larsen, C. López-Otín, M. J. O'Connell, J. W. Bickham, B. Thomsen, J. P.  
877 de Magalhães, Insights into the evolution of longevity from the bowhead whale genome. *Cell*  
878 *reports* **10**, 112-122 (2015).
- 879 4. E. B. Kim, X. Fang, A. A. Fushan, Z. Huang, A. V. Lobanov, L. Han, S. M. Marino, X. Sun, A. A.  
880 Turanov, P. Yang, S. H. Yim, X. Zhao, M. V. Kasaikina, N. Stoletzki, C. Peng, P. Polak, Z. Xiong, A.  
881 Kiezun, Y. Zhu, Y. Chen, G. V. Kryukov, Q. Zhang, L. Peshkin, L. Yang, R. T. Bronson, R.  
882 Buffenstein, B. Wang, C. Han, Q. Li, L. Chen, W. Zhao, S. R. Sunyaev, T. J. Park, G. Zhang, J.  
883 Wang, V. N. Gladyshev, Genome sequencing reveals insights into physiology and longevity of the  
884 naked mole rat. *Nature* **479**, 223-227 (2011).
- 885 5. I. Seim, X. Fang, Z. Xiong, A. V. Lobanov, Z. Huang, S. Ma, Y. Feng, A. A. Turanov, Y. Zhu, T. L.  
886 Lenz, M. V. Gerashchenko, D. Fan, S. Hee Yim, X. Yao, D. Jordan, Y. Xiong, Y. Ma, A. N.  
887 Lyapunov, G. Chen, O. I. Kulakova, Y. Sun, S.-G. Lee, R. T. Bronson, A. A. Moskalev, S. R.  
888 Sunyaev, G. Zhang, A. Krogh, J. Wang, V. N. Gladyshev, Genome analysis reveals insights into  
889 physiology and longevity of the Brandt's bat *Myotis brandtii*. *Nature communications* **4**, 2212-2212  
890 (2013).
- 891 6. M. Sulak, L. Fong, K. Mika, S. Chigurupati, L. Yon, N. P. Mongan, R. D. Emes, V. J. Lynch, TP53  
892 copy number expansion is associated with the evolution of increased body size and an enhanced  
893 DNA damage response in elephants. *Elife* **5**, e11994 (2016).
- 894 7. R. P. Perez, T. Komiya, TP53 Gene and Cancer Resistance in Elephants. *JAMA* **315**, 1789-1790  
895 (2016).
- 896 8. D. L. Stern, V. Orgogozo, The loci of evolution: how predictable is genetic evolution? *Evolution;*  
897 *international journal of organic evolution* **62**, 2155-2177 (2008).
- 898 9. M. Tatar, A. Kopelman, D. Epstein, M. P. Tu, C. M. Yin, R. S. Garofalo, A mutant *Drosophila* insulin  
899 receptor homolog that extends life-span and impairs neuroendocrine function. *Science* **292**, 107-  
900 110 (2001).
- 901 10. D. B. Friedman, T. E. Johnson, A mutation in the age-1 gene in *Caenorhabditis elegans* lengthens  
902 life and reduces hermaphrodite fertility. *Genetics* **118**, 75-86 (1988).
- 903 11. M. Holzenberger, J. Dupont, B. Ducos, P. Leneuve, A. Géloën, P. C. Even, P. Cervera, Y. Le Bouc,  
904 IGF-1 receptor regulates lifespan and resistance to oxidative stress in mice. *Nature* **421**, 182-187  
905 (2003).
- 906 12. R. A. Miller, D. E. Harrison, C. M. Astle, E. Fernandez, K. Flurkey, M. Han, M. A. Javors, X. Li, N. L.  
907 Nadon, J. F. Nelson, S. Pletcher, A. B. Salmon, Z. D. Sharp, S. Van Roekel, L. Winkleman, R.



- 908 Strong, Rapamycin-mediated lifespan increase in mice is dose and sex dependent and  
909 metabolically distinct from dietary restriction. *Aging Cell* **13**, 468-477 (2014).
- 910 13. D. E. Harrison, R. Strong, Z. D. Sharp, J. F. Nelson, C. M. Astle, K. Flurkey, N. L. Nadon, J. E.  
911 Wilkinson, K. Frenkel, C. S. Carter, M. Pahor, M. A. Javors, E. Fernandez, R. A. Miller, Rapamycin  
912 fed late in life extends lifespan in genetically heterogeneous mice. *Nature* **460**, 392-395 (2009).
- 913 14. C. J. Kenyon, The genetics of ageing. *Nature* **464**, 504-512 (2010).
- 914 15. Y. Kanfi, S. Naiman, G. Amir, V. Peshti, G. Zinman, L. Nahum, Z. Bar-Joseph, H. Y. Cohen, The  
915 sirtuin SIRT6 regulates lifespan in male mice. *Nature* **483**, 218-221 (2012).
- 916 16. A. A. Fushan, A. A. Turanov, S. G. Lee, E. B. Kim, A. V. Lobanov, S. H. Yim, R. Buffenstein, S. R.  
917 Lee, K. T. Chang, H. Rhee, J. S. Kim, K. S. Yang, V. N. Gladyshev, Gene expression defines  
918 natural changes in mammalian lifespan. *Aging Cell* **14**, 352-365 (2015).
- 919 17. S. Ma, A. Upneja, A. Galecki, Y. M. Tsai, C. F. Burant, S. Raskind, Q. Zhang, Z. D. Zhang, A.  
920 Seluanov, V. Gorbunova, C. B. Clish, R. A. Miller, V. N. Gladyshev, Cell culture-based profiling  
921 across mammals reveals DNA repair and metabolism as determinants of species longevity. *Elife* **5**,  
922 (2016).
- 923 18. D. Brawand, M. Soumillon, A. Necsulea, P. Julien, G. Csardi, P. Harrigan, M. Weier, A. Liechti, A.  
924 Aximu-Petri, M. Kircher, F. W. Albert, U. Zeller, P. Khaitovich, F. Grutzner, S. Bergmann, R. Nielsen,  
925 S. Paabo, H. Kaessmann, The evolution of gene expression levels in mammalian organs. *Nature*  
926 **478**, 343-348 (2011).
- 927 19. S. Ma, S. H. Yim, S. G. Lee, E. B. Kim, S. R. Lee, K. T. Chang, R. Buffenstein, K. N. Lewis, T. J.  
928 Park, R. A. Miller, C. B. Clish, V. N. Gladyshev, Organization of the Mammalian Metabolome  
929 according to Organ Function, Lineage Specialization, and Longevity. *Cell Metab* **22**, 332-343 (2015).
- 930 20. M. Cardoso-Moreira, J. Halbert, D. Valloton, B. Velten, C. Chen, Y. Shao, A. Liechti, K. Ascencio,  
931 C. Rummel, S. Ovchinnikova, P. V. Mazin, I. Xenarios, K. Harshman, M. Mort, D. N. Cooper, C.  
932 Sandi, M. J. Soares, P. G. Ferreira, S. Afonso, M. Carneiro, J. M. A. Turner, J. L. VandeBerg, A.  
933 Fallahshahroudi, P. Jensen, R. Behr, S. Lisgo, S. Lindsay, P. Khaitovich, W. Huber, J. Baker, S.  
934 Anders, Y. E. Zhang, H. Kaessmann, Gene expression across mammalian organ development.  
935 *Nature*, (2019).
- 936 21. K. Guschanski, M. Warnefors, H. Kaessmann, The evolution of duplicate gene expression in  
937 mammalian organs. *Genome Res* **27**, 1461-1474 (2017).
- 938 22. I. Sarropoulos, R. Marin, M. Cardoso-Moreira, H. Kaessmann, Developmental dynamics of  
939 lncRNAs across mammalian organs and species. *Nature* **571**, 510-514 (2019).
- 940 23. Z. Y. Wang, E. Leushkin, A. Liechti, S. Ovchinnikova, K. Mossinger, T. Bruning, C. Rummel, F.  
941 Grutzner, M. Cardoso-Moreira, P. Janich, D. Gatfield, B. Diagouraga, B. de Massy, M. E. Gill, A.  
942 Peters, S. Anders, H. Kaessmann, Transcriptome and translome co-evolution in mammals.  
943 *Nature*, (2020).
- 944 24. Z. Huang, C. V. Whelan, N. M. Foley, D. Jebb, F. Touzalin, E. J. Petit, S. J. Puechmaile, E. C.  
945 Teeling, Longitudinal comparative transcriptomics reveals unique mechanisms underlying extended  
946 healthspan in bats. *Nat Ecol Evol*, (2019).
- 947 25. P. Zhu, W. Liu, M. Li, G. Liu, Y. Yu, Z. Li, X. Li, J. Du, X. Wang, C. C. Grueter, M. Li, X. Zhou,  
948 Transcriptome signatures of co-evolution between social organization and lifespan in mammals. (**In**  
949 **preparation**), (2021).

- 950 26. X. Fang, I. Seim, Z. Huang, M. V. Gerashchenko, Z. Xiong, A. A. Turanov, Y. Zhu, A. V. Lobanov, D.  
951 Fan, S. H. Yim, X. Yao, S. Ma, L. Yang, S. G. Lee, E. B. Kim, R. T. Bronson, R. Šumbera, R.  
952 Buffenstein, X. Zhou, A. Krogh, T. J. Park, G. Zhang, J. Wang, V. N. Gladyshev, Adaptations to a  
953 subterranean environment and longevity revealed by the analysis of mole rat genomes. *Cell Rep* **8**,  
954 1354-1364 (2014).
- 955 27. M. Martínez-Pacheco, M. Tenorio, L. Almonte, V. Fajardo, A. Godínez, D. Fernández, P. Cornejo-  
956 Páramo, K. Díaz-Barba, J. Halbert, A. Liechti, T. Székely, A. O. Urrutia, D. Cortez, Expression  
957 Evolution of Ancestral XY Gametologs across All Major Groups of Placental Mammals. *Genome*  
958 *Biol Evol* **12**, 2015-2028 (2020).
- 959 28. J. Chen, R. Swofford, J. Johnson, B. B. Cummings, N. Rogel, K. Lindblad-Toh, W. Haerty, F. D.  
960 Palma, A. Regev, A quantitative framework for characterizing the evolutionary history of  
961 mammalian gene expression. *Genome Res* **29**, 53-63 (2019).
- 962 29. Q. Tang, Y. Gu, X. Zhou, L. Jin, J. Guan, R. Liu, J. Li, K. Long, S. Tian, T. Che, S. Hu, Y. Liang, X.  
963 Yang, X. Tao, Z. Zhong, G. Wang, X. Chen, D. Li, J. Ma, X. Wang, M. Mai, A. Jiang, X. Luo, X. Lv,  
964 V. N. Gladyshev, X. Li, M. Li, Comparative transcriptomics of 5 high-altitude vertebrates and their  
965 low-altitude relatives. *Gigascience* **6**, 1-9 (2017).
- 966 30. G. Yan, G. Zhang, X. Fang, Y. Zhang, C. Li, F. Ling, D. N. Cooper, Q. Li, Y. Li, A. J. van Gool, H.  
967 Du, J. Chen, R. Chen, P. Zhang, Z. Huang, J. R. Thompson, Y. Meng, Y. Bai, J. Wang, M. Zhuo, T.  
968 Wang, Y. Huang, L. Wei, J. Li, Z. Wang, H. Hu, P. Yang, L. Le, P. D. Stenson, B. Li, X. Liu, E. V.  
969 Ball, N. An, Q. Huang, Y. Zhang, W. Fan, X. Zhang, Y. Li, W. Wang, M. G. Katze, B. Su, R. Nielsen,  
970 H. Yang, J. Wang, X. Wang, J. Wang, Genome sequencing and comparison of two nonhuman  
971 primate animal models, the cynomolgus and Chinese rhesus macaques. *Nat Biotechnol* **29**, 1019-  
972 1023 (2011).
- 973 31. F. N. Carelli, A. Liechti, J. Halbert, M. Warnefors, H. Kaessmann, Repurposing of promoters and  
974 enhancers during mammalian evolution. *Nat Commun* **9**, 4066 (2018).
- 975 32. Y. Fan, Z. Y. Huang, C. C. Cao, C. S. Chen, Y. X. Chen, D. D. Fan, J. He, H. L. Hou, L. Hu, X. T.  
976 Hu, X. T. Jiang, R. Lai, Y. S. Lang, B. Liang, S. G. Liao, D. Mu, Y. Y. Ma, Y. Y. Niu, X. Q. Sun, J. Q.  
977 Xia, J. Xiao, Z. Q. Xiong, L. Xu, L. Yang, Y. Zhang, W. Zhao, X. D. Zhao, Y. T. Zheng, J. M. Zhou,  
978 Y. B. Zhu, G. J. Zhang, J. Wang, Y. G. Yao, Genome of the Chinese tree shrew. *Nat Commun* **4**,  
979 1426 (2013).
- 980 33. Q. Qiu, G. Zhang, T. Ma, W. Qian, J. Wang, Z. Ye, C. Cao, Q. Hu, J. Kim, D. M. Larkin, L. Auvil, B.  
981 Capitanu, J. Ma, H. A. Lewin, X. Qian, Y. Lang, R. Zhou, L. Wang, K. Wang, J. Xia, S. Liao, S. Pan,  
982 X. Lu, H. Hou, Y. Wang, X. Zang, Y. Yin, H. Ma, J. Zhang, Z. Wang, Y. Zhang, D. Zhang, T.  
983 Yonezawa, M. Hasegawa, Y. Zhong, W. Liu, Y. Zhang, Z. Huang, S. Zhang, R. Long, H. Yang, J.  
984 Wang, J. A. Lenstra, D. N. Cooper, Y. Wu, J. Wang, P. Shi, J. Wang, J. Liu, The yak genome and  
985 adaptation to life at high altitude. *Nat Genet* **44**, 946-949 (2012).
- 986 34. M. V. Westbury, B. Petersen, E. D. Lorenzen, Genomic analyses reveal an absence of  
987 contemporary introgressive admixture between fin whales and blue whales, despite known hybrids.  
988 *PLoS One* **14**, e0222004 (2019).
- 989 35. X. Peng, J. Thierry-Mieg, D. Thierry-Mieg, A. Nishida, L. Pipes, M. Bozinoski, M. J. Thomas, S.  
990 Kelly, J. M. Weiss, M. Raveendran, D. Muzny, R. A. Gibbs, J. Rogers, G. P. Schroth, M. G. Katze,  
991 C. E. Mason, Tissue-specific transcriptome sequencing analysis expands the non-human primate  
992 reference transcriptome resource (NHPRT). *Nucleic Acids Res* **43**, D737-742 (2015).

- 993 36. I. Yanai, H. Benjamin, M. Shmoish, V. Chalifa-Caspi, M. Shklar, R. Ophir, A. Bar-Even, S. Horn-  
994 Saban, M. Safran, E. Domany, D. Lancet, O. Shmueli, Genome-wide midrange transcription profiles  
995 reveal expression level relationships in human tissue specification. *Bioinformatics* **21**, 650-659  
996 (2005).
- 997 37. A. Copani, V. M. G. Bruno, V. Barresi, G. Battaglia, D. F. Condorelli, F. Nicoletti, Activation of  
998 Metabotropic Glutamate Receptors Prevents Neuronal Apoptosis in Culture. *Journal of*  
999 *Neurochemistry* **64**, 101-108 (1995).
- 1000 38. K. Maiese, A. Vincent, S.-H. Lin, T. Shaw, Group I and Group III metabotropic glutamate receptor  
1001 subtypes provide enhanced neuroprotection. *Journal of Neuroscience Research* **62**, 257-272  
1002 (2000).
- 1003 39. A. Aiba, C. Chen, K. Herrup, C. Rosenmund, C. F. Stevens, S. Tonegawa, Reduced hippocampal  
1004 long-term potentiation and context-specific deficit in associative learning in mGluR1 mutant mice.  
1005 *Cell* **79**, 365-375 (1994).
- 1006 40. G. G. Carter, J. M. Ratcliffe, B. G. Galef, Flower bats (*Glossophaga soricina*) and fruit bats (*Carollia*  
1007 *perspicillata*) rely on spatial cues over shapes and scents when relocating food. *PLoS One* **5**,  
1008 e10808 (2010).
- 1009 41. V. K. Maier, C. M. Feeney, J. E. Taylor, A. L. Creech, J. W. Qiao, A. Szanto, P. P. Das, N. Chevrier,  
1010 C. Cifuentes-Rojas, S. H. Orkin, S. A. Carr, J. D. Jaffe, P. Mertins, J. T. Lee, Functional Proteomic  
1011 Analysis of Repressive Histone Methyltransferase Complexes Reveals ZNF518B as a G9A  
1012 Regulator. *Mol Cell Proteomics* **14**, 1435-1446 (2015).
- 1013 42. R. M. Hofmann, C. M. Pickart, Noncanonical MMS2-encoded ubiquitin-conjugating enzyme  
1014 functions in assembly of novel polyubiquitin chains for DNA repair. *Cell* **96**, 645-653 (1999).
- 1015 43. C. Hoege, B. Pfander, G. L. Moldovan, G. Pyrowolakis, S. Jentsch, RAD6-dependent DNA repair is  
1016 linked to modification of PCNA by ubiquitin and SUMO. *Nature* **419**, 135-141 (2002).
- 1017 44. N. M. Foley, G. M. Hughes, Z. Huang, M. Clarke, D. Jebb, C. V. Whelan, E. J. Petit, F. Touzalin, O.  
1018 Farcy, G. Jones, R. D. Ransome, J. Kacprzyk, M. J. O'Connell, G. Kerth, H. Rebelo, L. Rodrigues,  
1019 S. J. Puechmaille, E. C. Teeling, Growing old, yet staying young: The role of telomeres in bats'  
1020 exceptional longevity. *Sci Adv* **4**, eaao0926 (2018).
- 1021 45. X. Brenachot, G. Ramadori, R. M. Ioris, C. Veyrat-Durebex, J. Altirriba, E. Aras, S. Ljubicic, D.  
1022 Kohno, S. Fabbiano, S. Clement, N. Goossens, M. Trajkovski, S. Harroch, F. Negro, R. Coppari,  
1023 Hepatic protein tyrosine phosphatase receptor gamma links obesity-induced inflammation to insulin  
1024 resistance. *Nature Communications* **8**, 1820 (2017).
- 1025 46. J. T. Daub, S. Moretti, Davydov, II, L. Excoffier, M. Robinson-Rechavi, Detection of Pathways  
1026 Affected by Positive Selection in Primate Lineages Ancestral to Humans. *Mol Biol Evol* **34**, 1391-  
1027 1402 (2017).
- 1028 47. J. T. Daub, T. Hofer, E. Cutivet, I. Dupanloup, L. Quintana-Murci, M. Robinson-Rechavi, L. Excoffier,  
1029 Evidence for polygenic adaptation to pathogens in the human genome. *Mol Biol Evol* **30**, 1544-1558  
1030 (2013).
- 1031 48. T. S. Tran, A. L. Kolodkin, R. Bharadwaj, Semaphorin regulation of cellular morphology. *Annu Rev*  
1032 *Cell Dev Biol* **23**, 263-292 (2007).
- 1033 49. R. J. Pasterkamp, R. J. Giger, Semaphorin function in neural plasticity and disease. *Curr Opin*  
1034 *Neurobiol* **19**, 263-274 (2009).
- 1035 50. B. Gao, Wnt regulation of planar cell polarity (PCP). *Curr Top Dev Biol* **101**, 263-295 (2012).

- 1036 51. L. G. Fradkin, J. M. Dura, J. N. Noordermeer, Ryks: new partners for Wnts in the developing and  
1037 regenerating nervous system. *Trends Neurosci* **33**, 84-92 (2010).
- 1038 52. R. J. Giger, E. R. Hollis, 2nd, M. H. Tuszynski, Guidance molecules in axon regeneration. *Cold*  
1039 *Spring Harb Perspect Biol* **2**, a001867 (2010).
- 1040 53. J. W. Fawcett, M. E. Schwab, L. Montani, N. Brazda, H. W. Müller, Defeating inhibition of  
1041 regeneration by scar and myelin components. *Handb Clin Neurol* **109**, 503-522 (2012).
- 1042 54. M. Monirujjaman, A. Ferdouse, Metabolic and Physiological Roles of Branched-Chain Amino Acids.  
1043 *Advances in Molecular Biology* **2014**, 364976 (2014).
- 1044 55. P. Juricic, S. Grönke, L. Partridge, Branched-Chain Amino Acids Have Equivalent Effects to Other  
1045 Essential Amino Acids on Lifespan and Aging-Related Traits in *Drosophila*. *J Gerontol A Biol Sci*  
1046 *Med Sci* **75**, 24-31 (2020).
- 1047 56. N. E. Richardson, E. N. Konon, H. S. Schuster, A. T. Mitchell, C. Boyle, A. C. Rodgers, M. Finke, L.  
1048 R. Haider, D. Yu, V. Flores, H. H. Pak, S. Ahmad, S. Ahmed, A. Radcliff, J. Wu, E. M. Williams, L.  
1049 Abdi, D. S. Sherman, T. A. Hacker, D. W. Lamming, Lifelong restriction of dietary branched-chain  
1050 amino acids has sex-specific benefits for frailty and life span in mice. *Nature Aging* **1**, 73-86 (2021).
- 1051 57. S. R. Lavin, W. H. Karasov, A. R. Ives, K. M. Middleton, T. Garland, Jr., Morphometrics of the avian  
1052 small intestine compared with that of nonflying mammals: a phylogenetic approach. *Physiol*  
1053 *Biochem Zool* **81**, 526-550 (2008).
- 1054 58. P. Westfall, S. Young, *Resampling-Based Multiple Testing: Examples and Methods for P-Value*  
1055 *Adjustment* (Wiley, 1993).
- 1056 59. L. Cheynel, J. F. Lemaître, J. M. Gaillard, B. Rey, G. Bourgoin, H. Ferte, M. Jégo, F. Débias, M.  
1057 Pellerin, L. Jacob, E. Gilot-Fromont, Immunosenescence patterns differ between populations but  
1058 not between sexes in a long-lived mammal. *Scientific Reports* **7**, 13700 (2017).
- 1059 60. H. G. Hilton, N. D. Rubinstein, P. Janki, A. T. Ireland, N. Bernstein, N. L. Fong, K. M. Wright, M.  
1060 Smith, D. Finkle, B. Martin-McNulty, M. Roy, D. M. Imai, V. Jojic, R. Buffenstein, Single-cell  
1061 transcriptomics of the naked mole-rat reveals unexpected features of mammalian immunity. *PLOS*  
1062 *Biology* **17**, e3000528 (2019).
- 1063 61. M. J. Youngman, Z. N. Rogers, D. H. Kim, A decline in p38 MAPK signaling underlies  
1064 immunosenescence in *Caenorhabditis elegans*. *PLoS Genet* **7**, e1002082 (2011).
- 1065 62. H. Chen, X. Zheng, Y. Zheng, Age-associated loss of lamin-B leads to systemic inflammation and  
1066 gut hyperplasia. *Cell* **159**, 829-843 (2014).
- 1067 63. E. Kalay, G. Yigit, Y. Aslan, K. E. Brown, E. Pohl, L. S. Bicknell, H. Kayserili, Y. Li, B. Tüysüz, G.  
1068 Nürnberg, W. Kiess, M. Koegl, I. Baessmann, K. Buruk, B. Toraman, S. Kayipmaz, S. Kul, M. Ikbal,  
1069 D. J. Turner, M. S. Taylor, J. Aerts, C. Scott, K. Milstein, H. Dollfus, D. Wieczorek, H. G. Brunner, M.  
1070 Hurles, A. P. Jackson, A. Rauch, P. Nürnberg, A. Karagüzel, B. Wollnik, CEP152 is a genome  
1071 maintenance protein disrupted in Seckel syndrome. *Nat Genet* **43**, 23-26 (2011).
- 1072 64. T. X. Jiang, J. B. Zou, Q. Q. Zhu, C. H. Liu, G. F. Wang, T. T. Du, Z. Y. Luo, F. Guo, L. M. Zhou, J.  
1073 J. Liu, W. Zhang, Y. S. Shu, L. Yu, P. Li, Z. A. Ronai, S. I. Matsuzawa, A. L. Goldberg, X. B. Qiu,  
1074 SIP/CacyBP promotes autophagy by regulating levels of BRUCE/Apollon, which stimulates LC3-I  
1075 degradation. *Proc Natl Acad Sci U S A* **116**, 13404-13413 (2019).
- 1076 65. S. Rosińska, A. Filipek, Interaction of CacyBP/SIP with NPM1 and its influence on NPM1  
1077 localization and function in oxidative stress. *J Cell Physiol* **233**, 8826-8838 (2018).

- 1078 66. V. Infantino, F. Dituri, P. Convertini, A. Santarsiero, F. Palmieri, S. Todisco, S. Mancarella, G.  
1079 Giannelli, V. Iacobazzi, Epigenetic upregulation and functional role of the mitochondrial  
1080 aspartate/glutamate carrier isoform 1 in hepatocellular carcinoma. *Biochim Biophys Acta Mol Basis*  
1081 *Dis* **1865**, 38-47 (2019).
- 1082 67. X. Tian, D. Firsanov, Z. Zhang, Y. Cheng, L. Luo, G. Tomblin, R. Tan, M. Simon, S. Henderson, J.  
1083 Steffan, A. Goldfarb, J. Tam, K. Zheng, A. Cornwell, A. Johnson, J.-N. Yang, Z. Mao, B. Manta, W.  
1084 Dang, Z. Zhang, J. Vijg, A. Wolfe, K. Moody, B. K. Kennedy, D. Bohmann, V. N. Gladyshev, A.  
1085 Seluanov, V. Gorbunova, SIRT6 Is Responsible for More Efficient DNA Double-Strand Break  
1086 Repair in Long-Lived Species. *Cell* **177**, 622-638.e622 (2019).
- 1087 68. K. M. Kim, J. H. Noh, M. Bodogai, J. L. Martindale, P. R. Pandey, X. Yang, A. Biragyn, K.  
1088 Abdelmohsen, M. Gorospe, SCAMP4 enhances the senescent cell secretome. *Genes Dev* **32**, 909-  
1089 914 (2018).
- 1090 69. G. Pegoraro, N. Kubben, U. Wickert, H. Göhler, K. Hoffmann, T. Misteli, Ageing-related chromatin  
1091 defects through loss of the NURD complex. *Nat Cell Biol* **11**, 1261-1267 (2009).
- 1092 70. M. R. Amin, S. A. Mahmud, J. L. Dowgielewicz, M. Sapkota, M. W. Pellegrino, A novel gene-diet  
1093 interaction promotes organismal lifespan and host protection during infection via the mitochondrial  
1094 UPR. *PLOS Genetics* **16**, e1009234 (2020).
- 1095 71. D. Wu, W. Cai, X. Zhang, J. Lan, L. Zou, S. J. Chen, Z. Wu, D. Chen, Inhibition of PAR-1 delays  
1096 aging via activating AMPK in *C. elegans*. *Aging (Albany NY)* **12**, 25700-25717 (2020).
- 1097 72. T. von der Haar, J. E. Leadsham, A. Sauvadet, D. Tarrant, I. S. Adam, K. Saromi, P. Laun, M.  
1098 Rinnerthaler, H. Breitenbach-Koller, M. Breitenbach, M. F. Tuite, C. W. Gourlay, The control of  
1099 translational accuracy is a determinant of healthy ageing in yeast. *Open Biol* **7**, (2017).
- 1100 73. V. E. Martinez-Miguel, C. Lujan, T. Espie--Caullet, D. Martinez-Martinez, S. Moore, C. Backes, S.  
1101 Gonzalez, E. R. Galimov, A. E. X. Brown, M. Halic, K. Tomita, C. Rallis, T. von der Haar, F.  
1102 Cabreiro, I. Bjedov, Increased fidelity of protein synthesis extends lifespan. *Cell Metabolism* **33**,  
1103 2288-2300.e2212 (2021).
- 1104 74. J. Azpurua, Z. Ke, I. X. Chen, Q. Zhang, D. N. Ermolenko, Z. D. Zhang, V. Gorbunova, A. Seluanov,  
1105 Naked mole-rat has increased translational fidelity compared with the mouse, as well as a unique  
1106 28S ribosomal RNA cleavage. *Proc Natl Acad Sci U S A* **110**, 17350-17355 (2013).
- 1107 75. A. S. Anisimova, M. B. Meerson, M. V. Gerashchenko, I. V. Kulakovskiy, S. E. Dmitriev, V. N.  
1108 Gladyshev, Multifaceted deregulation of gene expression and protein synthesis with age. *Proc Natl*  
1109 *Acad Sci U S A* **117**, 15581-15590 (2020).
- 1110 76. Y. Li, X. Li, M. Cao, Y. Jiang, J. Yan, Z. Liu, R. Yang, X. Chen, P. Sun, R. Xiang, L. Wang, Y. Shi,  
1111 Seryl tRNA synthetase cooperates with POT1 to regulate telomere length and cellular senescence.  
1112 *Signal Transduction and Targeted Therapy* **4**, (2019).
- 1113 77. T. Shimizu, A. Lengalova, V. Martinek, M. Martinkova, Heme: emergent roles of heme in signal  
1114 transduction, functional regulation and as catalytic centres. *Chem Soc Rev* **48**, 5624-5657 (2019).
- 1115 78. R. S. Balaban, S. Nemoto, T. Finkel, Mitochondria, oxidants, and aging. *Cell* **120**, 483-495 (2005).
- 1116 79. O. Adedoyin, R. Boddu, A. Traylor, J. M. Lever, S. Bolisetty, J. F. George, A. Agarwal, Heme  
1117 oxygenase-1 mitigates ferroptosis in renal proximal tubule cells. *Am J Physiol Renal Physiol* **314**,  
1118 F702-F714 (2018).
- 1119 80. A. Fransson, A. Ruusala, P. Aspenström, Atypical Rho GTPases have roles in mitochondrial  
1120 homeostasis and apoptosis. *J Biol Chem* **278**, 6495-6502 (2003).

- 1121 81. K. Wu, S. Katiyar, A. Li, M. Liu, X. Ju, V. M. Popov, X. Jiao, M. P. Lisanti, A. Casola, R. G. Pestell,  
1122 Dachshund inhibits oncogene-induced breast cancer cellular migration and invasion through  
1123 suppression of interleukin-8. *Proc Natl Acad Sci U S A* **105**, 6924-6929 (2008).
- 1124 82. J. Gambini, L. Gimeno-Mallench, M. Inglés, G. Olaso, K. M. Abdelaziz, J. A. Avellana, Á. Belenguer,  
1125 R. Cruz, C. Mas-Bargues, C. Borrás, J. Viña, Identification of single nucleotide polymorphisms in  
1126 centenarians. *Rev Esp Geriatr Gerontol* **51**, 146-149 (2016).
- 1127 83. Y. Wang, V. K. Rao, W. K. Kok, D. N. Roy, S. Sethi, B. M. Ling, M. B. Lee, R. Taneja, SUMO  
1128 modification of Stra13 is required for repression of cyclin D1 expression and cellular growth arrest.  
1129 *PLoS One* **7**, e43137 (2012).
- 1130 84. Y. Qian, J. Zhang, B. Yan, X. Chen, DEC1, a basic helix-loop-helix transcription factor and a novel  
1131 target gene of the p53 family, mediates p53-dependent premature senescence. *J Biol Chem* **283**,  
1132 2896-2905 (2008).
- 1133 85. Z. Yun, H. L. Maecker, R. S. Johnson, A. J. Giaccia, Inhibition of PPAR gamma 2 gene expression  
1134 by the HIF-1-regulated gene DEC1/Stra13: a mechanism for regulation of adipogenesis by hypoxia.  
1135 *Dev Cell* **2**, 331-341 (2002).
- 1136 86. Rommel A. Mathias, Todd M. Greco, A. Oberstein, Hanna G. Budayeva, R. Chakrabarti,  
1137 Elizabeth A. Rowland, Y. Kang, T. Shenk, Ileana M. Cristea, Sirtuin 4 Is a Lipoamidase Regulating  
1138 Pyruvate Dehydrogenase Complex Activity. *Cell* **159**, 1615-1625 (2014).
- 1139 87. J. Kaplon, L. Zheng, K. Meissl, B. Chaneton, V. A. Selivanov, G. Mackay, S. H. van der Burg, E. M.  
1140 Verdegaal, M. Cascante, T. Shlomi, E. Gottlieb, D. S. Peeper, A key role for mitochondrial  
1141 gatekeeper pyruvate dehydrogenase in oncogene-induced senescence. *Nature* **498**, 109-112  
1142 (2013).
- 1143 88. E. Bang, B. Lee, S.-G. Noh, D. H. Kim, H. J. Jung, S. Ha, B. P. Yu, H. Y. Chung, Modulation of  
1144 senoinflammation by calorie restriction based on biochemical and Omics big data analysis. *BMB*  
1145 *Rep* **52**, 56-63 (2019).
- 1146 89. C. Vasavda, R. Kothari, A. P. Malla, R. Tokhunts, A. Lin, M. Ji, C. Ricco, R. Xu, H. G. Saavedra, J. I.  
1147 Sbodio, A. M. Snowman, L. Albacarys, L. Hester, T. W. Sedlak, B. D. Paul, S. H. Snyder, Bilirubin  
1148 Links Heme Metabolism to Neuroprotection by Scavenging Superoxide. *Cell Chem Biol* **26**, 1450-  
1149 1460.e1457 (2019).
- 1150 90. J. Melrose, Keratan sulfate (KS)-proteoglycans and neuronal regulation in health and disease: the  
1151 importance of KS-glycodynamics and interactive capability with neuroregulatory ligands. *J*  
1152 *Neurochem* **149**, 170-194 (2019).
- 1153 91. I. Zironi, P. Gaibani, D. Remondini, S. Salvioli, S. Altília, M. Pierini, G. Aicardi, E. Verondini, L.  
1154 Milanese, F. Bersani, S. Gravina, I. B. Roninson, C. Franceschi, G. Castellani, Molecular remodeling  
1155 of potassium channels in fibroblasts from centenarians: a marker of longevity? *Mech Ageing Dev*  
1156 **131**, 674-681 (2010).
- 1157 92. P. Smith, E. Buhl, K. Tsaneva-Atanasova, J. J. L. Hodge, Shaw and Shal voltage-gated potassium  
1158 channels mediate circadian changes in *Drosophila* clock neuron excitability. *J Physiol* **597**, 5707-  
1159 5722 (2019).
- 1160 93. K. Tucker, J. M. Overton, D. A. Fadool, Kv1.3 gene-targeted deletion alters longevity and reduces  
1161 adiposity by increasing locomotion and metabolism in melanocortin-4 receptor-null mice. *Int J Obes*  
1162 *(Lond)* **32**, 1222-1232 (2008).

- 1163 94. C. Cirelli, D. Bushey, S. Hill, R. Huber, R. Kreber, B. Ganetzky, G. Tononi, Reduced sleep in  
1164 *Drosophila* Shaker mutants. *Nature* **434**, 1087-1092 (2005).
- 1165 95. J. V. Pluvinage, M. S. Haney, B. A. H. Smith, J. Sun, T. Iram, L. Bonanno, L. Li, D. P. Lee, D. W.  
1166 Morgens, A. C. Yang, S. R. Shuken, D. Gate, M. Scott, P. Khatri, J. Luo, C. R. Bertozzi, M. C.  
1167 Bassik, T. Wyss-Coray, CD22 blockade restores homeostatic microglial phagocytosis in ageing  
1168 brains. *Nature* **568**, 187-192 (2019).
- 1169 96. L. L. Chen, Y. B. Wang, J. X. Song, W. K. Deng, J. H. Lu, L. L. Ma, C. B. Yang, M. Li, Y. Xue,  
1170 Phosphoproteome-based kinase activity profiling reveals the critical role of MAP2K2 and PLK1 in  
1171 neuronal autophagy. *Autophagy* **13**, 1969-1980 (2017).
- 1172 97. G. Maria Fimia, A. Stoykova, A. Romagnoli, L. Giunta, S. Di Bartolomeo, R. Nardacci, M. Corazzari,  
1173 C. Fuoco, A. Ucar, P. Schwartz, P. Gruss, M. Piacentini, K. Chowdhury, F. Cecconi, Ambra1  
1174 regulates autophagy and development of the nervous system. *Nature* **447**, 1121-1125 (2007).
- 1175 98. A. Simonsen, R. C. Cumming, A. Brech, P. Isakson, D. R. Schubert, K. D. Finley, Promoting basal  
1176 levels of autophagy in the nervous system enhances longevity and oxidant resistance in adult  
1177 *Drosophila*. *Autophagy* **4**, 176-184 (2008).
- 1178 99. V. K. Parihar, B. D. Allen, K. K. Tran, N. N. Chmielewski, B. M. Craver, V. Martirosian, J. M.  
1179 Morganti, S. Rosi, R. Vlkolinsky, M. M. Acharya, G. A. Nelson, A. R. Allen, C. L. Limoli, Targeted  
1180 overexpression of mitochondrial catalase prevents radiation-induced cognitive dysfunction. *Antioxid*  
1181 *Redox Signal* **22**, 78-91 (2015).
- 1182 100. A. Csiszar, A. Yabluchanskiy, A. Ungvari, Z. Ungvari, S. Tarantini, Overexpression of catalase  
1183 targeted to mitochondria improves neurovascular coupling responses in aged mice. *Geroscience* **41**,  
1184 609-617 (2019).
- 1185 101. W. Tan, W. Wang, Q. Ma, Physiological and Pathological Function of Serine/Arginine-Rich Splicing  
1186 Factor 4 and Related Diseases. *Biomed Res Int* **2018**, 3819719 (2018).
- 1187 102. S. M. Kwon, S. Min, U. W. Jeoun, M. S. Sim, G. H. Jung, S. M. Hong, B. A. Jee, H. G. Woo, C. Lee,  
1188 G. Yoon, Global spliceosome activity regulates entry into cellular senescence. *Faseb j* **35**, e21204  
1189 (2021).
- 1190 103. J. Larrasa-Alonso, M. Villalba, F. Sanchez-Cabo, M. Lopez-Olaneta, P. Ortiz-Sanchez, P. Garcia-  
1191 Pavia, E. Lara-Pezzi, in *Cardiovascular Research*. (Oxford Univ. Press, Oxford, 2016), vol. 111, pp.  
1192 S36-S36.
- 1193 104. S. Hassock, D. Vetrie, F. Giannelli, Mapping and characterization of the X-linked dyskeratosis  
1194 congenita (DKC) gene. *Genomics* **55**, 21-27 (1999).
- 1195 105. E. Latorre, L. W. Harries, Splicing regulatory factors, ageing and age-related disease. *Ageing Res*  
1196 *Rev* **36**, 165-170 (2017).
- 1197 106. H. Guo, Y. Li, M. Luo, S. Lin, J. Chen, Q. Ma, Y. Gu, Z. Jiang, Y. Gui, Androgen receptor binding to  
1198 an androgen-responsive element in the promoter of the Srsf4 gene inhibits its expression in mouse  
1199 Sertoli cells. *Mol Reprod Dev* **82**, 976-985 (2015).
- 1200 107. T. G. Son, Y. Zou, B. P. Yu, J. Lee, H. Y. Chung, Aging effect on myeloperoxidase in rat kidney and  
1201 its modulation by calorie restriction. *Free Radic Res* **39**, 283-289 (2005).
- 1202 108. Z. Cheng, M. F. White, Targeting Forkhead box O1 from the concept to metabolic diseases:  
1203 lessons from mouse models. *Antioxid Redox Signal* **14**, 649-661 (2011).
- 1204 109. J. O. Wertheim, B. Murrell, M. D. Smith, S. L. Kosakovsky Pond, K. Scheffler, RELAX: detecting  
1205 relaxed selection in a phylogenetic framework. *Mol Biol Evol* **32**, 820-832 (2015).

- 1206 110.R. Cui, T. Medeiros, D. Willemsen, L. N. M. Iasi, G. E. Collier, M. Graef, M. Reichard, D. R.  
1207 Valenzano, Relaxed Selection Limits Lifespan by Increasing Mutation Load. *Cell*, (2019).
- 1208 111.D. A. Chavous, F. R. Jackson, C. M. O'Connor, Extension of the Drosophila lifespan by  
1209 overexpression of a protein repair methyltransferase. *Proc Natl Acad Sci U S A* **98**, 14814-14818  
1210 (2001).
- 1211 112.J. Kim, K. J. Lee, J. S. Kim, J. G. Rho, J. J. Shin, W. K. Song, E. K. Lee, J. M. Egan, W. Kim,  
1212 Cannabinoids Regulate Bcl-2 and Cyclin D2 Expression in Pancreatic  $\beta$  Cells. *PLoS One* **11**,  
1213 e0150981 (2016).
- 1214 113.S. Singh, N. Dhaliwal, R. Crawford, Y. Xiao, Cellular senescence and longevity of osteophyte-  
1215 derived mesenchymal stem cells compared to patient-matched bone marrow stromal cells. *J Cell*  
1216 *Biochem* **108**, 839-850 (2009).
- 1217 114.T. J. Hale, B. C. Richardson, L. I. Sweet, D. L. McElligott, J. E. Riggs, E. B. Chu, J. M. Glynn, D.  
1218 LaFrenz, D. N. Ernst, R. Rochford, M. V. Hobbs, Age-related changes in mature CD4+ T cells: cell  
1219 cycle analysis. *Cell Immunol* **220**, 51-62 (2002).
- 1220 115.G. Hoxhaj, E. Caddy, A. Najafav, V. P. Houde, C. Johnson, K. Dissanayake, R. Toth, D. G.  
1221 Campbell, A. R. Prescott, C. MacKintosh, The E3 ubiquitin ligase ZNRF2 is a substrate of mTORC1  
1222 and regulates its activation by amino acids. *Elife* **5**, (2016).
- 1223 116.I. Pradas, M. Jové, R. Cabré, V. Ayala, N. Mota-Martorell, R. Pamplona, Effects of Aging and  
1224 Methionine Restriction on Rat Kidney Metabolome. *Metabolites* **9**, (2019).
- 1225 117.S. M. Lam, Z. Wang, J. Li, X. Huang, G. Shui, Sequestration of polyunsaturated fatty acids in  
1226 membrane phospholipids of *Caenorhabditis elegans* dauer larva attenuates eicosanoid  
1227 biosynthesis for prolonged survival. *Redox Biol* **12**, 967-977 (2017).
- 1228 118.C. Bárcena, P. M. Quirós, S. Durand, P. Mayoral, F. Rodríguez, X. M. Caravia, G. Mariño, C.  
1229 Garabaya, M. T. Fernández-García, G. Kroemer, J. M. P. Freije, C. López-Otín, Methionine  
1230 Restriction Extends Lifespan in Progeroid Mice and Alters Lipid and Bile Acid Metabolism. *Cell Rep*  
1231 **24**, 2392-2403 (2018).
- 1232 119.I. Sanchez-Roman, G. Barja, Regulation of longevity and oxidative stress by nutritional  
1233 interventions: role of methionine restriction. *Exp Gerontol* **48**, 1030-1042 (2013).
- 1234 120.M. Lezzerini, Y. Budovskaya, A dual role of the Wnt signaling pathway during aging in  
1235 *Caenorhabditis elegans*. *Aging Cell* **13**, 8-18 (2014).
- 1236 121.V. A. Rafalski, A. Brunet, Energy metabolism in adult neural stem cell fate. *Prog Neurobiol* **93**, 182-  
1237 203 (2011).
- 1238 122.G. Laurent, F. Solari, B. Mateescu, M. Karaca, J. Castel, B. Bourachot, C. Magnan, M. Billaud, F.  
1239 Mechta-Grigoriou, Oxidative stress contributes to aging by enhancing pancreatic angiogenesis and  
1240 insulin signaling. *Cell Metab* **7**, 113-124 (2008).
- 1241 123.N. Boucher, T. Dufeu-Duchesne, E. Vicaut, D. Farge, R. B. Effros, F. Schächter, CD28 expression  
1242 in T cell aging and human longevity. *Exp Gerontol* **33**, 267-282 (1998).
- 1243 124.J. Azpurua, Z. Ke, I. X. Chen, Q. Zhang, D. N. Ermolenko, Z. D. Zhang, V. Gorbunova, A. Seluanov,  
1244 Naked mole-rat has increased translational fidelity compared with the mouse, as well as a unique  
1245 28S ribosomal RNA cleavage. *Proceedings of the National Academy of Sciences* **110**, 17350  
1246 (2013).
- 1247 125.O. Omotoso, V. N. Gladyshev, X. Zhou, Lifespan Extension in Long-Lived Vertebrates Rooted in  
1248 Ecological Adaptation. *Front Cell Dev Biol* **9**, 704966 (2021).



- 1249 126.R. K. Patel, M. Jain, NGS QC Toolkit: a toolkit for quality control of next generation sequencing data.  
1250 *PLoS One* **7**, e30619 (2012).
- 1251 127.M. Keane, J. Semeiks, A. E. Webb, Y. I. Li, V. Quesada, T. Craig, L. B. Madsen, S. van Dam, D.  
1252 Brawand, P. I. Marques, P. Michalak, L. Kang, J. Bhak, H. S. Yim, N. V. Grishin, N. H. Nielsen, M.  
1253 P. Heide-Jørgensen, E. M. Oziolor, C. W. Matson, G. M. Church, G. W. Stuart, J. C. Patton, J. C.  
1254 George, R. Suydam, K. Larsen, C. López-Otín, M. J. O'Connell, J. W. Bickham, B. Thomsen, J. P.  
1255 de Magalhães, Insights into the evolution of longevity from the bowhead whale genome. *Cell Rep*  
1256 **10**, 112-122 (2015).
- 1257 128.M. Stanke, M. Diekhans, R. Baertsch, D. Haussler, Using native and syntenically mapped cDNA  
1258 alignments to improve de novo gene finding. *Bioinformatics* **24**, 637-644 (2008).
- 1259 129.M. G. Grabherr, B. J. Haas, M. Yassour, J. Z. Levin, D. A. Thompson, I. Amit, X. Adiconis, L. Fan, R.  
1260 Raychowdhury, Q. Zeng, Z. Chen, E. Mauceli, N. Hacohen, A. Gnirke, N. Rhind, F. di Palma, B. W.  
1261 Birren, C. Nusbaum, K. Lindblad-Toh, N. Friedman, A. Regev, Full-length transcriptome assembly  
1262 from RNA-Seq data without a reference genome. *Nat Biotechnol* **29**, 644-652 (2011).
- 1263 130.W. Li, A. Godzik, Cd-hit: a fast program for clustering and comparing large sets of protein or  
1264 nucleotide sequences. *Bioinformatics* **22**, 1658-1659 (2006).
- 1265 131.L. Fu, B. Niu, Z. Zhu, S. Wu, W. Li, CD-HIT: accelerated for clustering the next-generation  
1266 sequencing data. *Bioinformatics* **28**, 3150-3152 (2012).
- 1267 132.C. Trapnell, B. A. Williams, G. Pertea, A. Mortazavi, G. Kwan, M. J. van Baren, S. L. Salzberg, B. J.  
1268 Wold, L. Pachter, Transcript assembly and quantification by RNA-Seq reveals unannotated  
1269 transcripts and isoform switching during cell differentiation. *Nat Biotechnol* **28**, 511-515 (2010).
- 1270 133.G. M. Boratyn, C. Camacho, P. S. Cooper, G. Coulouris, A. Fong, N. Ma, T. L. Madden, W. T.  
1271 Matten, S. D. McGinnis, Y. Merezuk, Y. Raytselis, E. W. Sayers, T. Tao, J. Ye, I. Zaretskaya,  
1272 BLAST: a more efficient report with usability improvements. *Nucleic Acids Res* **41**, W29-33 (2013).
- 1273 134.A. Dobin, C. A. Davis, F. Schlesinger, J. Drenkow, C. Zaleski, S. Jha, P. Batut, M. Chaisson, T. R.  
1274 Gingeras, STAR: ultrafast universal RNA-seq aligner. *Bioinformatics* **29**, 15-21 (2013).
- 1275 135.Y. Liao, G. K. Smyth, W. Shi, featureCounts: an efficient general purpose program for assigning  
1276 sequence reads to genomic features. *Bioinformatics* **30**, 923-930 (2014).
- 1277 136.J. T. Leek, W. E. Johnson, H. S. Parker, A. E. Jaffe, J. D. Storey, The sva package for removing  
1278 batch effects and other unwanted variation in high-throughput experiments. *Bioinformatics* **28**, 882-  
1279 883 (2012).
- 1280 137.K. Fukushima, D. D. Pollock, Amalgamated cross-species transcriptomes reveal organ-specific  
1281 propensity in gene expression evolution. *Nat Commun* **11**, 4459 (2020).
- 1282 138.M. D. Robinson, D. J. McCarthy, G. K. Smyth, edgeR: a Bioconductor package for differential  
1283 expression analysis of digital gene expression data. *Bioinformatics* **26**, 139-140 (2010).
- 1284 139.S. Lê, J. Josse, F. Husson, FactoMineR: An R Package for Multivariate Analysis. *Journal of*  
1285 *Statistical Software* **1**, (2008).
- 1286 140.K. E. Jones, J. Bielby, M. Cardillo, S. A. Fritz, J. O'Dell, C. D. L. Orme, K. Safi, W. Sechrest, E. H.  
1287 Boakes, C. Carbone, PanTHERIA: a species - level database of life history, ecology, and  
1288 geography of extant and recently extinct mammals: Ecological Archives E090 - 184. *Ecology* **90**,  
1289 2648-2648 (2009).
- 1290 141.S. Kumar, G. Stecher, M. Suleski, S. B. Hedges, TimeTree: A Resource for Timelines, Timetrees,  
1291 and Divergence Times. *Mol Biol Evol* **34**, 1812-1819 (2017).

- 1292 142.S. van Buuren, K. Groothuis-Oudshoorn, mice: Multivariate Imputation by Chained Equations in R.  
1293 *Journal of Statistical Software* **1**, (2011).
- 1294 143.D. J. Stekhoven, P. Bühlmann, MissForest—non-parametric missing value imputation for mixed-  
1295 type data. *Bioinformatics* **28**, 112-118 (2012).
- 1296 144.J. Bruggeman, J. Heringa, B. W. Brandt, PhyloPars: estimation of missing parameter values using  
1297 phylogeny. *Nucleic Acids Research* **37**, W179-W184 (2009).
- 1298 145.T. Santos. (R package version 0.3, 2018).
- 1299 146.F. Abascal, R. Zardoya, M. J. Telford, TranslatorX: multiple alignment of nucleotide sequences  
1300 guided by amino acid translations. *Nucleic Acids Research* **38**, W7-W13 (2010).
- 1301 147.K. Katoh, K. Misawa, K. Kuma, T. Miyata, MAFFT: a novel method for rapid multiple sequence  
1302 alignment based on fast Fourier transform. *Nucleic Acids Res* **30**, 3059-3066 (2002).
- 1303 148.J. Castresana, Selection of conserved blocks from multiple alignments for their use in phylogenetic  
1304 analysis. *Mol Biol Evol* **17**, 540-552 (2000).
- 1305 149.G. Talavera, J. Castresana, Improvement of phylogenies after removing divergent and ambiguously  
1306 aligned blocks from protein sequence alignments. *Syst Biol* **56**, 564-577 (2007).
- 1307 150.M. Lek, K. J. Karczewski, E. V. Minikel, K. E. Samocha, E. Banks, T. Fennell, A. H. O'Donnell-Luria,  
1308 J. S. Ware, A. J. Hill, B. B. Cummings, T. Tukiainen, D. P. Birnbaum, J. A. Kosmicki, L. E. Duncan,  
1309 K. Estrada, F. Zhao, J. Zou, E. Pierce-Hoffman, J. Berghout, D. N. Cooper, N. DeFlaux, M. DePristo,  
1310 R. Do, J. Flannick, M. Fromer, L. Gauthier, J. Goldstein, N. Gupta, D. Howrigan, A. Kiezun, M. I.  
1311 Kurki, A. L. Moonshine, P. Natarajan, L. Orozco, G. M. Peloso, R. Poplin, M. A. Rivas, V. Ruano-  
1312 Rubio, S. A. Rose, D. M. Ruderfer, K. Shakir, P. D. Stenson, C. Stevens, B. P. Thomas, G. Tiao, M.  
1313 T. Tusie-Luna, B. Weisburd, H. H. Won, D. Yu, D. M. Altshuler, D. Ardissino, M. Boehnke, J.  
1314 Danesh, S. Donnelly, R. Elosua, J. C. Florez, S. B. Gabriel, G. Getz, S. J. Glatt, C. M. Hultman, S.  
1315 Kathiresan, M. Laakso, S. McCarroll, M. I. McCarthy, D. McGovern, R. McPherson, B. M. Neale, A.  
1316 Palotie, S. M. Purcell, D. Saleheen, J. M. Scharf, P. Sklar, P. F. Sullivan, J. Tuomilehto, M. T.  
1317 Tsuang, H. C. Watkins, J. G. Wilson, M. J. Daly, D. G. MacArthur, Analysis of protein-coding  
1318 genetic variation in 60,706 humans. *Nature* **536**, 285-291 (2016).
- 1319 151.P. D. Stenson, M. Mort, E. V. Ball, K. Evans, M. Hayden, S. Heywood, M. Hussain, A. D. Phillips, D.  
1320 N. Cooper, The Human Gene Mutation Database: towards a comprehensive repository of inherited  
1321 mutation data for medical research, genetic diagnosis and next-generation sequencing studies.  
1322 *Human Genetics* **136**, 665-677 (2017).
- 1323 152.H. A. Shihab, M. F. Rogers, C. Campbell, T. R. Gaunt, HIPred: an integrative approach to  
1324 predicting haploinsufficient genes. *Bioinformatics* **33**, 1751-1757 (2017).
- 1325 153.Y. Shao, C. Chen, H. Shen, B. Z. He, D. Yu, S. Jiang, S. Zhao, Z. Gao, Z. Zhu, X. Chen, Y. Fu, H.  
1326 Chen, G. Gao, M. Long, Y. E. Zhang, GenTree, an integrated resource for analyzing the evolution  
1327 and function of primate-specific coding genes. *Genome Res* **29**, 682-696 (2019).
- 1328
- 1329

1330 **Table, Figures and Legends**

1331

1332 **Table 1 Statistics on genes whose expression variation is associated with life-history variation**

1333

| Variable*                        | Liver (n = 13, 508) <sup>†</sup> |              | Kidney (n = 13, 183) |              | Brain (n = 12, 950) |              | Combined <sup>¶</sup>   |
|----------------------------------|----------------------------------|--------------|----------------------|--------------|---------------------|--------------|-------------------------|
|                                  | Nb. of genes <sup>‡</sup>        | % from total | Nb. of genes         | % from total | Nb. of genes        | % from total |                         |
| Adult weight                     | 122 (101)                        | 0.90 (0.75)  | 144 (119)            | 1.09 (0.90)  | 179 (127)           | 1.38 (0.98)  | 440 (5)                 |
| Maximum lifespan                 | 148 (81)                         | 1.10 (0.60)  | 83 (47)              | 0.63 (0.36)  | 91 (59)             | 0.70 (0.37)  | 311 (11)                |
| Female time to maturity          | 155 (72)                         | 1.15 (0.53)  | 131 (94)             | 0.99 (0.71)  | 137 (101)           | 1.06 (0.69)  | 413 (8)                 |
| Maximum lifespan residual        | 96 (51)                          | 0.71 (0.38)  | 96 (56)              | 0.73 (0.42)  | 131 (81)            | 1.01 (0.66)  | 323 (1)                 |
| Female time to maturity residual | 195 (133)                        | 1.44 (0.98)  | 155 (102)            | 1.18 (0.77)  | 172 (104)           | 1.33 (0.80)  | 518 (4)                 |
| Combined <sup>§</sup>            | 563 (114)                        | 4.17 (0.84)  | 497 (79)             | 3.77 (0.60)  | 569 (88)            | 4.39 (0.68)  | 1557 (275) <sup>#</sup> |

1334

1335 \* The adjusted PGLS P-value cutoff is  $P_{robust} < 0.01$  and  $P_{max} < 0.05$ .

1336 † n denotes total number of orthologous groups assayed in the analysis.

1337 ‡ Number of unique genes associated with trait variation and number of genes specific for a trait (in brackets).

1338 § Number of unique genes identified in the organ and number of core genes in the organ (in brackets).

1339 ¶ Number of unique genes identified in three organs for a specific trait and overlap in at least two organs (in brackets).

1340 # Number of unique genes identified in three organs for all traits and number of core genes in all organs (in brackets).

1341

1342

1343

1344

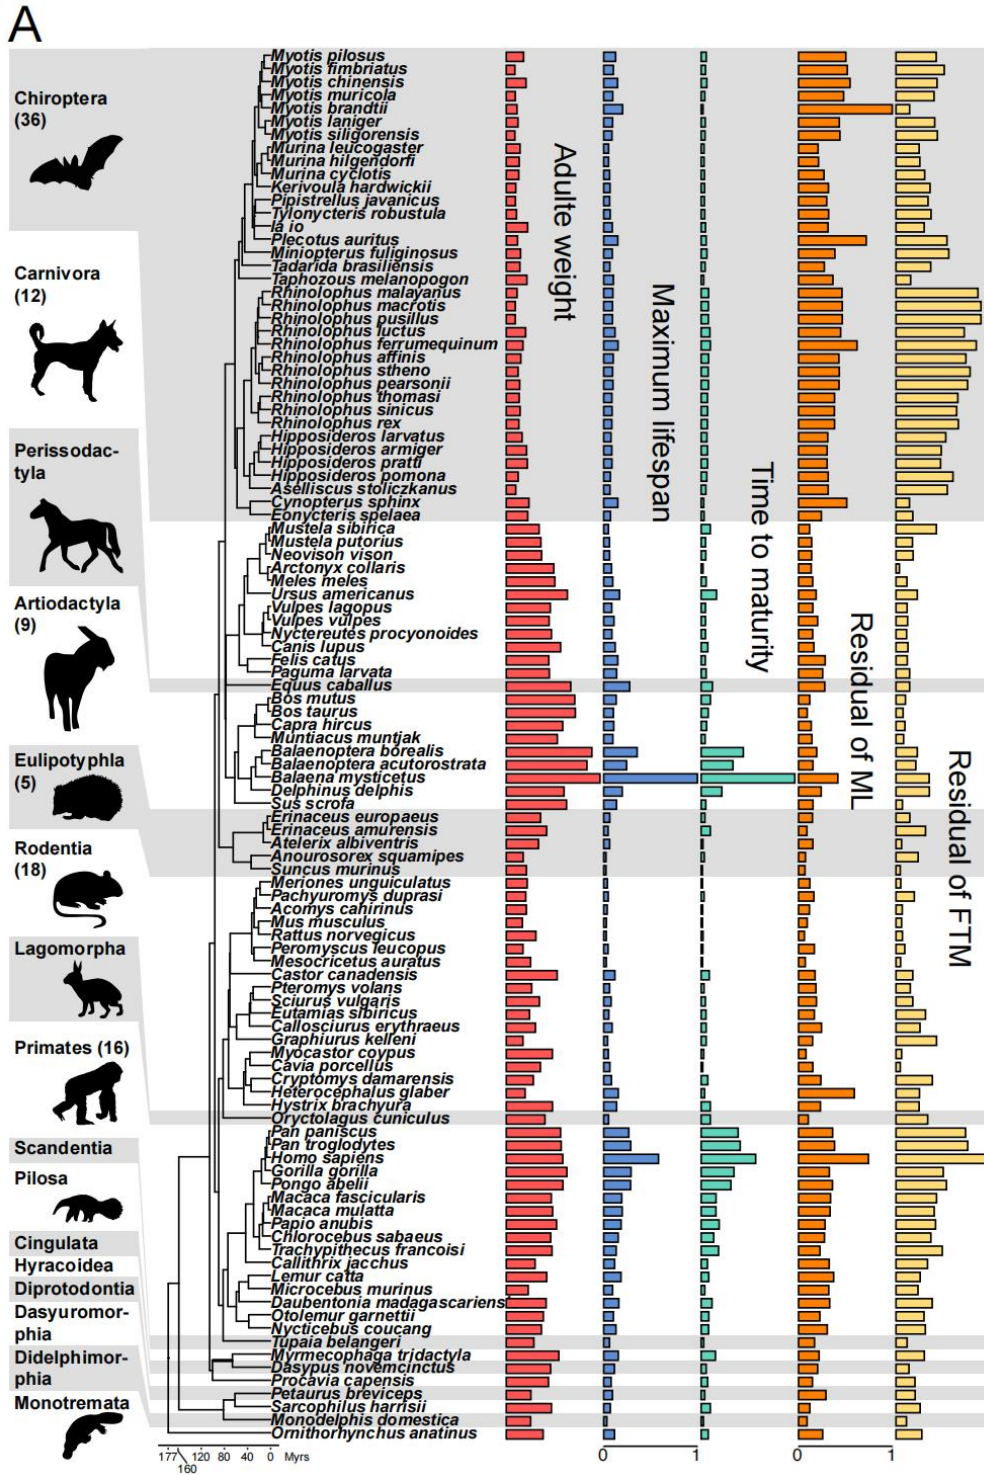

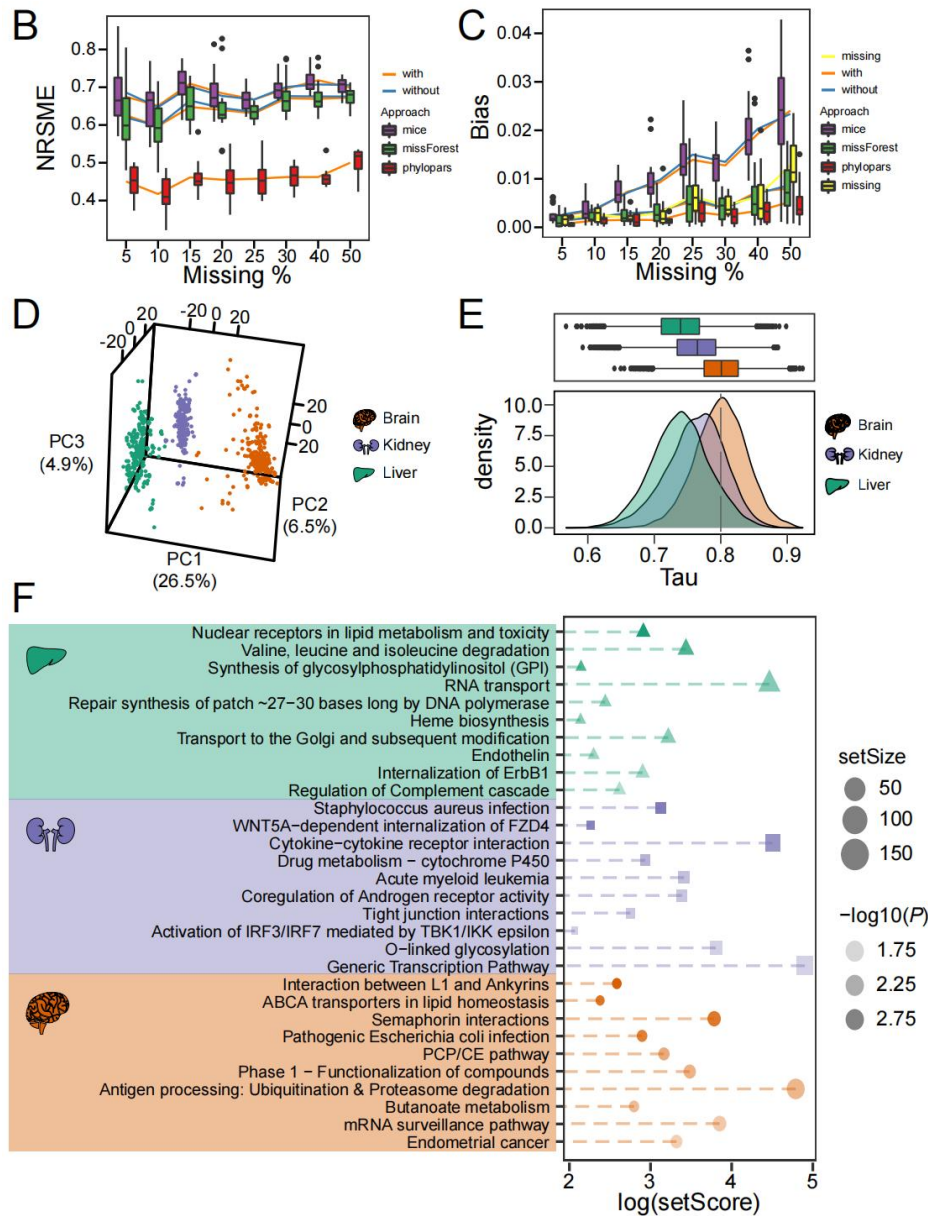

1346

1347

1348 **Fig. 1. Life-history traits and gene expression profile of mammals.** (A) Mammalian  
 1349 phylogenetic tree with corresponding life-history traits. From left to right: Adult weight  
 1350 ( $\log_{10}$ -transform), maximum lifespan, female sexual maturity time, and residual of the  
 1351 maximum lifespan and female sexual maturity time relative to the adult weight. Each bar  
 1352 denotes a value of life-history variable for a particular organism in standard scale. The  
 1353 animals image retrieved from PhyloPic (<http://www.phylopic.org/>) (B) Estimation accuracy  
 1354 of missing values of life history traits: the x-axis is the proportion of missing values, and  
 1355 the y-axis is the standard root mean square error (NRSME). (C) Estimation bias of  
 1356 missing values: the x-axis is the proportion of missing values, and the y-axis is the bias of  
 1357 biological significance. (D) Principal component analysis of gene expression across  
 1358 tissues. The first three principal components (PCs) and their variance explanation  
 1359 percentages are shown. Each repetition is treated as a point. (E) Distribution of species-

1360 specific expression index (Tau) in the three tissues. Different organs are shown by  
1361 different colors. The x-axis is the species-specific expression index; the y-axis represents  
1362 the frequency (below). The dotted line represents the threshold of the species-specific  
1363 expression index. (*F*) Enrichment analysis of species-specifically expressed genes for  
1364 each tissue (Liver: green; Kidney: blue; Brain: orange). The x-axis is the log-transformed  
1365 gene set score. The depth of the color represents the degree of significance of pathway  
1366 enrichment, and dot size represents the size of the gene set.  
1367

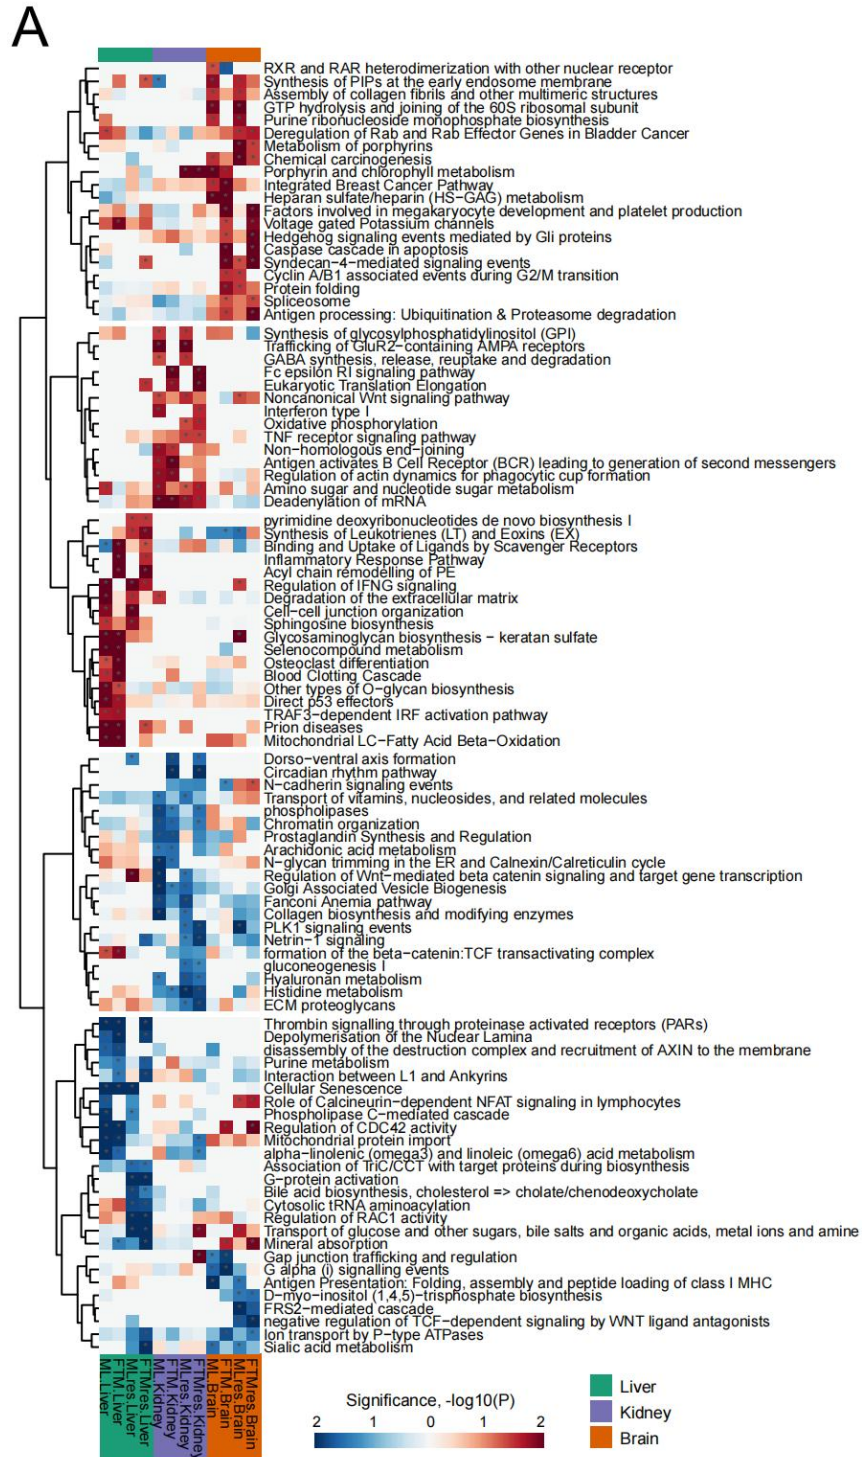

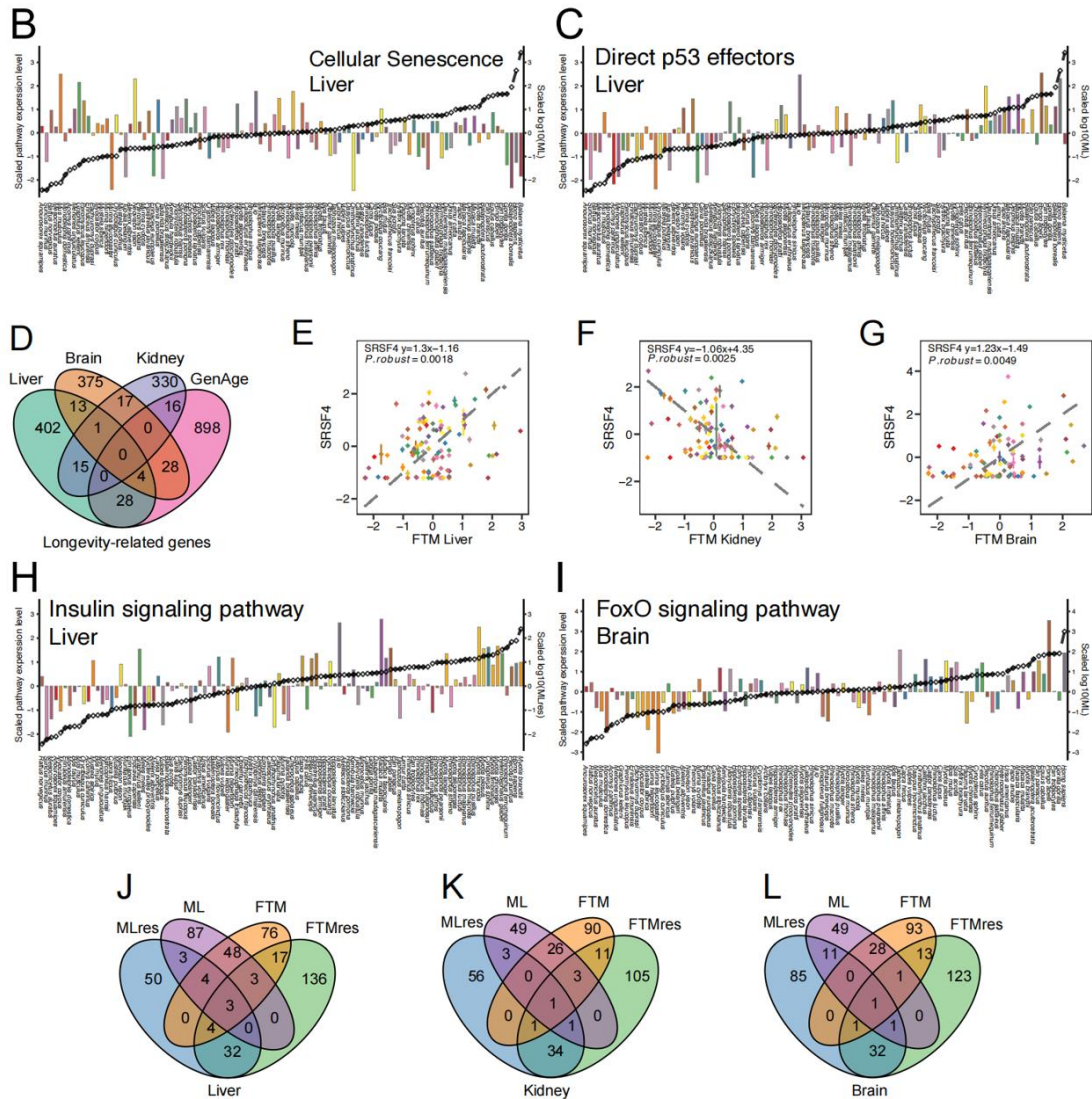

1369

1370

1371 **Fig. 2. Relationship between gene expression variation and longevity.** (A) Heat map of the pathways enriched by longevity-related genes. The color intensity indicates the degree of significance, and the  $P$  value is transformed ( $-\log_{10}$ ). Each row represents a different pathway, and each column represents traits related to longevity (marked at the bottom). Among them, red and blue colors show positive and negative correlations, respectively. The bar graph is the total expression of (B) Cellular Senescence negative longevity-related genes and (C) Direct p53 effectors positive longevity-related genes in the liver (y-axis on the left). Black line is the relative value of life-history variable (y-axis on the right). Species are shown at the bottom. All values are in standard scale. (D) Venn diagrams of the three tissues for longevity-related genes and aging genes of model organisms, obtained from the GenAge database. (E, F, G) *SRSF4* is positively correlated with longevity traits in the liver and brain, and negatively correlated in the kidney. In each figure, the y-axis is the scaled expression level of each gene with 0 as the center, and the x-axis represents the longevity traits (ML: maximum lifespan; FTM: female time to maturity; MLres and FTMres: ML and FTM residuals adjusted for adult weight). Potential

1372  
1373  
1374  
1375  
1376  
1377  
1378  
1379  
1380  
1381  
1382  
1383  
1384  
1385



1386 outliers have been removed. The optimal phylogenetic regression equation,  $P$  value is  
1387 included in the figure. The bar graph is the total expression of ( $H$ ) Insulin signaling  
1388 pathway and ( $I$ ) FoxO signaling pathway positive longevity-related genes in the liver and  
1389 brain, respectively (y-axis on the left). Black line is the relative value of life-history  
1390 variable (y-axis on the right). Species are shown at the bottom. All values are in standard  
1391 scale. ( $J$ ,  $K$ ,  $L$ ) Venn diagrams of each tissue for longevity-related genes.  
1392

1393

1394

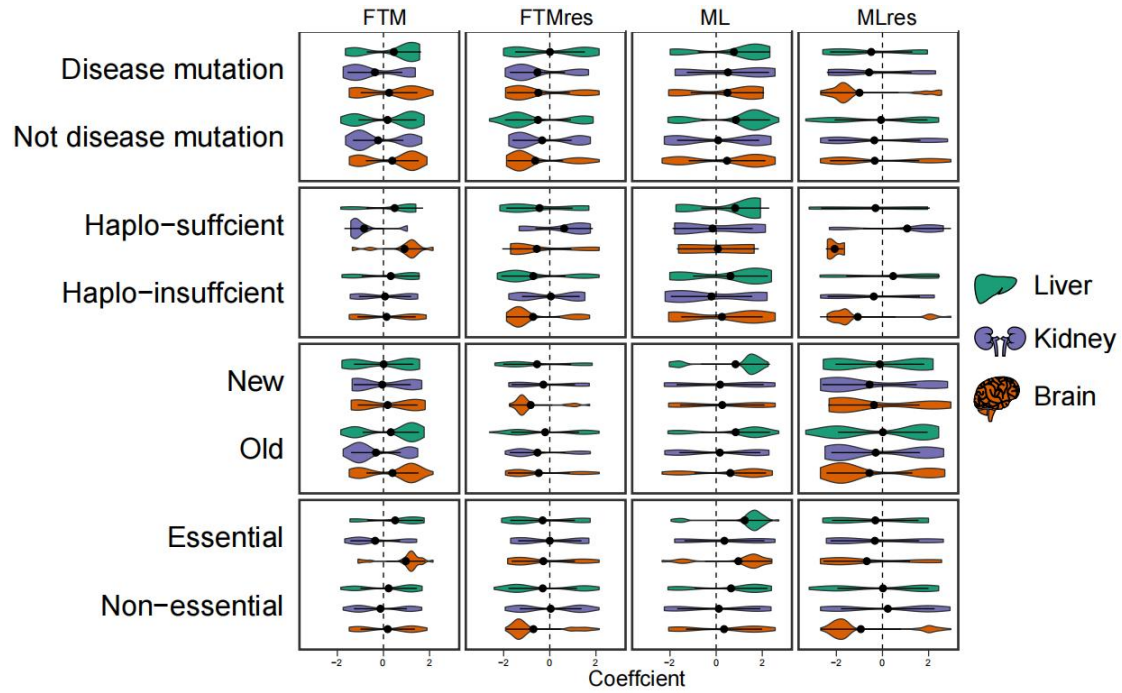

1395

1396

1397

1398

1399

1400

1401

1402

1403

1404

**Fig. 3. Comparison between the variation of gene expression and the gradient of longevity traits among different gene categories.** On the x-axis, the coefficient represents the rate of gene expression variation with life-history gradient. The violin plot and black dots represent the mean of the variation rate in a specific functional gene category, respectively.

1405

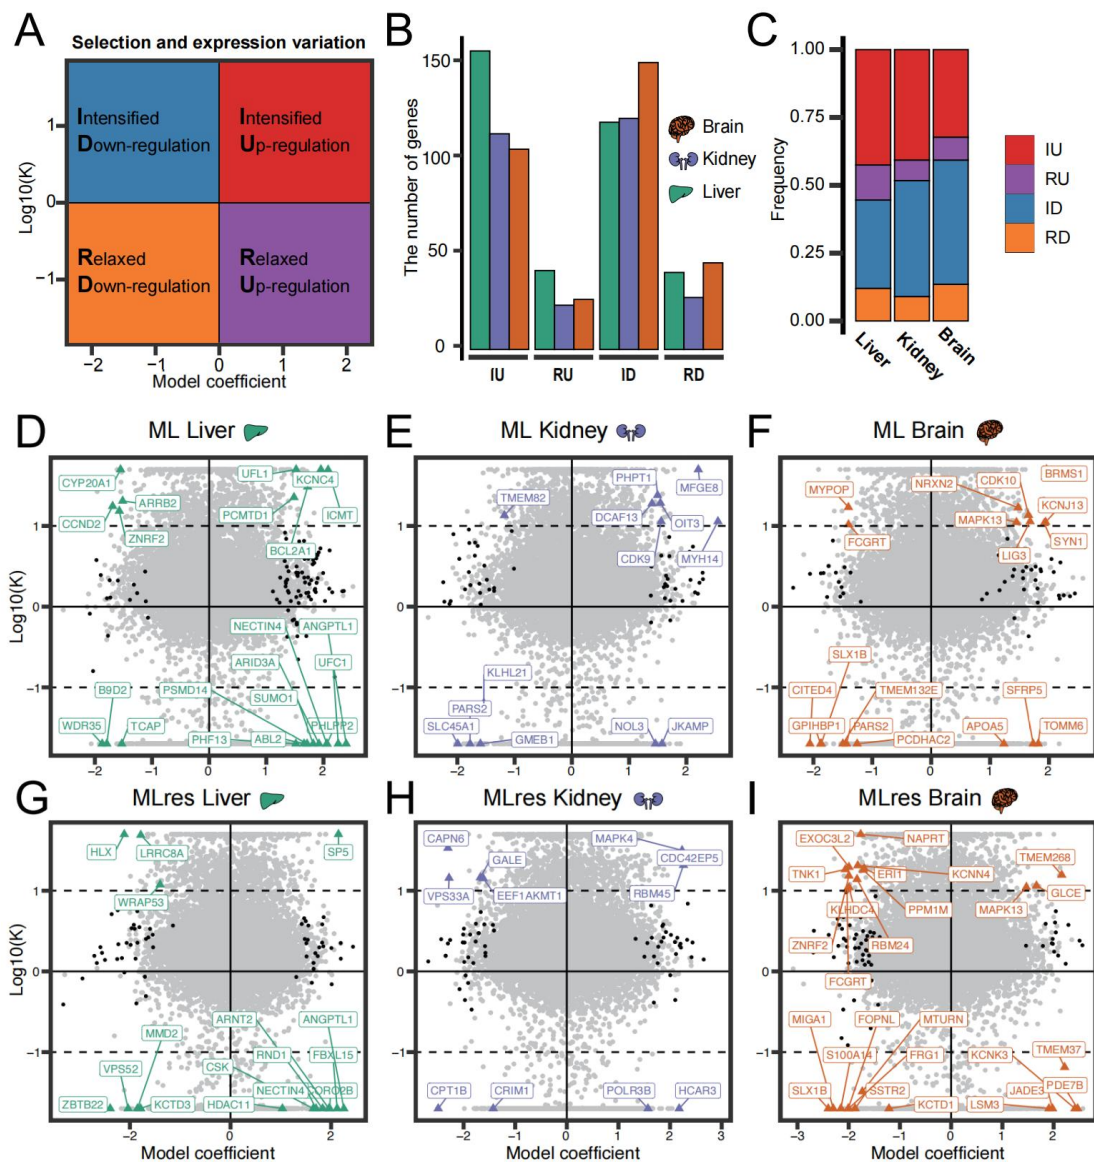

1406

1407

1408

1409

1410

1411

1412

1413

1414

1415

1416

1417

1418

1419

1420

**Fig. 4. Pattern of association between selection index ( $k$ ) and coefficients, and**

**longevity. (A) Colored picture illustrating the annotation of gene classification. (B)**

Number of genes in the three organs assigned to different gene classifications. IU stands

for genes that are positively related to longevity and are under intensified selection; RU

stands for genes that are positively related to longevity and are under relaxed choice; ID

represents a gene that is negatively related to longevity and is under intensified selection;

RD stands for genes that are negatively related to longevity and are under relaxed

selection. (C) Cumulative frequency histogram showing the distribution of gene types in

different organs. (D-I) Scatter plot showing the log<sub>10</sub>-transformed relaxation parameter ( $k$ )

on the y-axis, and the variation rate of gene expression along the longevity trait gradient

on the x-axis. The colored points represent longevity-related genes with strong selection

signals (the color corresponds to the tissue type shown in panel A), the black points

represent longevity-related genes with weak selection signals, and the grey points

represent genes that are not significant.
